# Supplementary material for: Disruption of glycolytic flux is a signal for inflammasome signaling and pyroptotic cell death
Source: eLife. 2016 Mar 24;5:e13663. doi: 10.7554/eLife.13663 (PMC4846378; doi:10.7554/eLife.13663)
Supplement: Supplementary file 1. — BMDM from four different treatment conditions (see Figure 2) were lysed and lysates reacted with alkyne-biotin. Biotin-labeled proteins were enriched using streptavidin resin, digested off the resin, and bound proteins identified by mass spectrometry. Number of spectral counts from peptides from each identified protein are reported for each condition. DOI: http://dx.doi.org/10.7554/eLife.13663.035 [file elife-13663-supp1.xlsx]

## Sheet: Sheet1
Supplementary File 1: Full MudPIT results
	0	0	1	1
Protein	Condition 4; DMSO	Condition 2; GB111-NH2/az-GB	Condition 3; GB-IA/az-GB	Condition 1; DMSO/az-GB	Pearson
sp|P10605|CATB_MOUSE - Ctsb Cathepsin B [REVIEWED] ENSMUSG00000021939;IPI00113517;P10605;Q3UDW7 xxxxx	294	204	133	1285	0.490584
sp|O70370|CATS_MOUSE - Ctss Cathepsin S [REVIEWED] ENSMUSG00000038642;IPI00309520;O70370;E9QK18;O54973 xxxxx	82	129	75	854	0.545314
sp|P60710|ACTB_MOUSE - Actb Actin, cytoplasmic 1 [REVIEWED] ENSMUSG00000029580;IPI00110850;P60710;P02570;P70514;P99021;Q11211;Q3TI89;Q3TVP6;Q64316;Q6ZWM3 xxxxx	499	630	196	429	-0.799984
sp|Q91ZA3|PCCA_MOUSE - Pcca Propionyl-CoA carboxylase alpha chain, mitochondrial [REVIEWED] ENSMUSG00000041650;IPI00330523;Q91ZA3;Q80VU5;Q922N3 xxxxx	494	364	121	240	-0.893892
sp|Q8BTM8|FLNA_MOUSE - Flna Filamin-A [REVIEWED] ENSMUSG00000031328;IPI00387373;Q8BTM8;B7FAV0;O54934;Q7TQI1;Q8BLK1;Q8BTN7;Q8VHX5;Q8VHX8;Q99KQ2 xxxxx	193	296	143	220	-0.569489
sp|P52480|KPYM_MOUSE - Pkm Pyruvate kinase isozymes M1/M2 [REVIEWED] ENSMUSG00000032294;IPI00845840;P52480;Q3TBV8;Q3TBW5;Q3TC59;Q3U1X3;Q3U5P6;Q4VC20;Q64484;Q91YI8;Q9CWB1 xxxxx	289	204	64	219	-0.643192
sp|Q68FD5|CLH_MOUSE - Cltc Clathrin heavy chain 1 [REVIEWED] ENSMUSG00000047126;IPI00169916;Q68FD5 xxxxx	221	240	137	216	-0.684862
sp|P26039|TLN1_MOUSE - Tln1 Talin-1 [REVIEWED] ENSMUSG00000028465;IPI00465786;P26039;A2AIM8;Q8VEF0 xxxxx	94	206	122	192	0.0747435
sp|Q9JKF1|IQGA1_MOUSE - Iqgap1 Ras GTPase-activating-like protein IQGAP1 [REVIEWED] ENSMUSG00000030536;IPI00467447;Q9JKF1;G3UW45 xxxxx	174	233	105	191	-0.601319
sp|P16675|PPGB_MOUSE - Ctsa Lysosomal protective protein [REVIEWED] ENSMUSG00000017760;IPI00137177;P16675;Q8VEF6 xxxxx	49	100	32	179	0.2712
sp|Q61233|PLSL_MOUSE - Lcp1 Plastin-2 [REVIEWED] ENSMUSG00000021998;IPI00118892;Q61233;Q3UE24;Q8R1X3;Q9CV77 xxxxx	129	229	93	177	-0.430134
sp|P16858|G3P_MOUSE - Gapdh Glyceraldehyde-3-phosphate dehydrogenase [REVIEWED] ENSMUSG00000096438;ENSMUSG00000078965;ENSMUSG00000057666;IPI00273646;P16858;A6H6A8;Q0QEU0;Q3THM2;Q3TUI2;Q3UMT2;Q4V783;Q569X2;Q569X5;Q5U410 xxxxx	181	203	113	170	-0.759871
sp|P68134|ACTS_MOUSE - Acta1 Actin, alpha skeletal muscle [REVIEWED] ENSMUSG00000031972;IPI00110827;P68134;P02568;P99020 xxxxx	150	244	94	166	-0.624805
sp|Q9JHU4|DYHC1_MOUSE - Dync1h1 Cytoplasmic dynein 1 heavy chain 1 [REVIEWED] ENSMUSG00000018707;IPI00119876;Q9JHU4;E9QM71 xxxxx	63	143	40	130	-0.206828
sp|P20029|GRP78_MOUSE - Hspa5 78 kDa glucose-regulated protein [REVIEWED] ENSMUSG00000026864;IPI00319992;P20029;O35642;Q3UFF2;Q61630 xxxxx	182	133	19	127	-0.70979
sp|P10126|EF1A1_MOUSE - Eef1a1 Elongation factor 1-alpha 1 [REVIEWED] ENSMUSG00000037742;IPI00307837;P10126;Q61511;Q6ZWN2;Q8BMB8;Q8BVS8;Q99KU5 xxxxx	71	140	70	111	-0.255525
sp|Q8VDD5|MYH9_MOUSE - Myh9 Myosin-9 [REVIEWED] ENSMUSG00000022443;IPI00123181;Q8VDD5;Q3UHT9;Q3UHU4;Q6KAN6;Q811I2 xxxxx	142	213	56	98	-0.864878
sp|Q8BFZ3|ACTBL_MOUSE - Actbl2 Beta-actin-like protein 2 [REVIEWED] ENSMUSG00000055194;IPI00221528;Q8BFZ3 xxxxx	102	158	32	92	-0.760644
sp|P99024|TBB5_MOUSE - Tubb5 Tubulin beta-5 chain [REVIEWED] ENSMUSG00000001525;IPI00117352;P99024;B1B178;P05218;Q3TFB6;Q3THH9;Q3TIL1;Q3UAV4;Q3UF52;Q8WUC1;Q9CY33 xxxxx	27	178	39	90	-0.319508
sp|Q69ZN7|MYOF_MOUSE - Myof Myoferlin [REVIEWED] ENSMUSG00000048612;IPI00989268;Q69ZN7;Q7TMG0;Q80V33;Q8BU64;Q8BU70;Q8BUC1;Q8BVY6;Q8C0D1;Q8R3B4 xxxxx	70	89	23	89	-0.435577
sp|P68369|TBA1A_MOUSE - Tuba1a Tubulin alpha-1A chain [REVIEWED] ENSMUSG00000072235;IPI00110753;P68369;P02551;P05210;P05212;Q3TGF0;Q3TIW2;Q3TPJ1;Q3ULN1;Q5XJF8 xxxxx	16	55	15	87	0.258594
sp|P58252|EF2_MOUSE - Eef2 Elongation factor 2 [REVIEWED] ENSMUSG00000034994;IPI00466069;P58252;Q544E4 xxxxx	108	134	20	82	-0.827259
sp|P49935|CATH_MOUSE - Ctsh Pro-cathepsin H [REVIEWED] ENSMUSG00000032359;IPI00118987;P49935;Q3UCD6 xxxxx	8	29	35	79	0.744979
sp|Q91ZX7|LRP1_MOUSE - Lrp1 Prolow-density lipoprotein receptor-related protein 1 [REVIEWED] ENSMUSG00000040249;IPI00119063;Q91ZX7;Q61291;Q920Y4 xxxxx	98	107	47	78	-0.86854
sp|P68368|TBA4A_MOUSE - Tuba4a Tubulin alpha-4A chain [REVIEWED] ENSMUSG00000026202;IPI00117350;P68368;P05215;Q3TY31 xxxxx	22	66	17	77	0.056929
sp|Q61093|CY24B_MOUSE - Cybb Cytochrome b-245 heavy chain [REVIEWED] ENSMUSG00000015340;IPI00117117;Q61093 xxxxx	90	49	25	77	-0.367455
sp|P12265|BGLR_MOUSE - Gusb Beta-glucuronidase [REVIEWED] ENSMUSG00000025534;IPI00309230;P12265;Q61601;Q64473;Q64474;Q6IR10 xxxxx	60	54	24	76	-0.185826
sp|P68372|TBB4B_MOUSE - Tubb4b Tubulin beta-4B chain [REVIEWED] ENSMUSG00000036752;IPI00169463;P68372;P05217;Q3TKF0;Q3UJ73;Q99JZ6 xxxxx	25	147	34	76	-0.321715
sp|Q8R016|BLMH_MOUSE - Blmh Bleomycin hydrolase [REVIEWED] ENSMUSG00000020840;IPI00153107;Q8R016;Q3TJR8;Q8BLZ4;Q8BZH9;Q8C111;Q8CID9 xxxxx	6	152	19	75	-0.277998
sp|Q9WV32|ARC1B_MOUSE - Arpc1b Actin-related protein 2/3 complex subunit 1B [REVIEWED] ENSMUSG00000029622;IPI00125143;Q9WV32;Q9CRC4 xxxxx	89	113	9	74	-0.771963
sp|P16110|LEG3_MOUSE - Lgals3 Galectin-3 [REVIEWED] ENSMUSG00000050335;IPI00131259;P16110 xxxxx	92	109	32	74	-0.829039
sp|P17182|ENOA_MOUSE - Eno1 Alpha-enolase [REVIEWED] ENSMUSG00000059040;ENSMUSG00000063524;IPI00462072;P17182;Q99KT7;Q9DCY7 xxxxx	64	39	54	71	0.45754
sp|P62814|VATB2_MOUSE - Atp6v1b2 V-type proton ATPase subunit B, brain isoform [REVIEWED] ENSMUSG00000006273;IPI00119113;P62814;O09045;P50517;Q3TG74;Q3TL62;Q3TVK6;Q3TWR0;Q3U791;Q3U7C8;Q3U9Z0;Q3UAW7 xxxxx	57	59	33	71	-0.217643
sp|O88342|WDR1_MOUSE - Wdr1 WD repeat-containing protein 1 [REVIEWED] ENSMUSG00000005103;IPI00314748;O88342 xxxxx	58		11	71	-0.310947
sp|Q8VDN2|AT1A1_MOUSE - Atp1a1 Sodium/potassium-transporting ATPase subunit alpha-1 [REVIEWED] ENSMUSG00000033161;IPI00311682;Q8VDN2;Q91Z09 xxxxx	69	54	44	68	-0.265003
sp|P47738|ALDH2_MOUSE - Aldh2 Aldehyde dehydrogenase, mitochondrial [REVIEWED] ENSMUSG00000029455;IPI00111218;P47738 xxxxx	103	96	80	68	-0.933152
sp|P63017|HSP7C_MOUSE - Hspa8 Heat shock cognate 71 kDa protein [REVIEWED] ENSMUSG00000015656;IPI00323357;P63017;P08109;P12225;Q3U6R0;Q3U764;Q3U7D7;Q3U7E2;Q3U9B4;Q3U9G0;Q3UGM0;Q5FWJ6;Q62373;Q62374;Q62375;Q6NZD0 xxxxx	77	64	21	67	-0.616989
sp|Q61598|GDIB_MOUSE - Gdi2 Rab GDP dissociation inhibitor beta [REVIEWED] ENSMUSG00000021218;IPI00416577;Q61598;Q541Z9;Q8C530;Q9D8M9 xxxxx	91	67	17	67	-0.686245
sp|Q04447|KCRB_MOUSE - Ckb Creatine kinase B-type [REVIEWED] ENSMUSG00000001270;IPI00136703;Q04447;Q3KQP4;Q3TKI3;Q3U5P5;Q3UF71;Q9CXK6 xxxxx	111	81	46	66	-0.843274
sp|Q99MR8|MCCA_MOUSE - Mccc1 Methylcrotonoyl-CoA carboxylase subunit alpha, mitochondrial [REVIEWED] ENSMUSG00000027709;IPI00320850;Q99MR8;Q3TGU0;Q9D8R2 xxxxx	187	220	103	62	-0.955813
sp|Q99P91|GPNMB_MOUSE - Gpnmb Transmembrane glycoprotein NMB [REVIEWED] ENSMUSG00000029816;IPI00311808;Q99P91;Q3U3R9;Q8BVV9;Q8BXL4;Q9QXA0 xxxxx	166	111	9	60	-0.890843
sp|Q02053|UBA1_MOUSE - Uba1 Ubiquitin-like modifier-activating enzyme 1 [REVIEWED] ENSMUSG00000001924;IPI00123313;Q02053;A6H6S6;P31253;Q542H8 xxxxx	52	43	16	59	-0.306426
sp|P50516|VATA_MOUSE - Atp6v1a V-type proton ATPase catalytic subunit A [REVIEWED] ENSMUSG00000052459;IPI00844689;P50516;Q3TKS0;Q3U5W3;Q3U777;Q3UDZ9;Q3US31;Q8CHX2 xxxxx	42	64	24	59	-0.366095
tr|Q9Z1R9|Q9Z1R9_MOUSE - Prss1 Protease, serine, 1 (Trypsin 1) [NOT_REVIEWED] ENSMUSG00000062751;IPI00130391;Q9Z1R9 xxxxx	72	95	6	59	-0.78047
sp|P05064|ALDOA_MOUSE - Aldoa Fructose-bisphosphate aldolase A [REVIEWED] ENSMUSG00000030695;IPI00221402;P05064 xxxxx	101	87	14	59	-0.8652
sp|Q9DCD0|6PGD_MOUSE - Pgd 6-phosphogluconate dehydrogenase, decarboxylating [REVIEWED] ENSMUSG00000028961;IPI00466919;Q9DCD0;Q3UD80 xxxxx	46	50	52	57	0.820553
sp|P14211|CALR_MOUSE - Calr Calreticulin [REVIEWED] ENSMUSG00000003814;IPI00123639;P14211;Q3TVD2 xxxxx	47	65	8	57	-0.537046
sp|Q7TMM9|TBB2A_MOUSE - Tubb2a Tubulin beta-2A chain [REVIEWED] ENSMUSG00000058672;IPI00338039;Q7TMM9 xxxxx	21	116	17	56	-0.403258
sp|Q9WUM4|COR1C_MOUSE - Coro1c Coronin-1C [REVIEWED] ENSMUSG00000004530;IPI00124820;Q9WUM4;Q8VCQ5 xxxxx	66	44	14	56	-0.512316
sp|P26041|MOES_MOUSE - Msn Moesin [REVIEWED] ENSMUSG00000031207;IPI00110588;P26041;B1AX70;Q3UL28;Q8BSN4 xxxxx	99	77	49	56	-0.908541
sp|Q01853|TERA_MOUSE - Vcp Transitional endoplasmic reticulum ATPase [REVIEWED] ENSMUSG00000028452;IPI00622235;Q01853;Q3TFH9;Q3TIM2;Q3TXN9;Q6PI18;Q8BSR6;Q8CEG4 xxxxx	51	35	19	54	-0.232328
sp|P13020|GELS_MOUSE - Gsn Gelsolin [REVIEWED] ENSMUSG00000026879;IPI00759948;P13020;Q3UPB1;Q8R590 xxxxx	36	58	19	51	-0.400445
sp|P18760|COF1_MOUSE - Cfl1 Cofilin-1 [REVIEWED] ENSMUSG00000056201;IPI00407543;P18760 xxxxx	132	104	13	51	-0.932253
sp|Q8BMS1|ECHA_MOUSE - Hadha Trifunctional enzyme subunit alpha, mitochondrial [REVIEWED] ENSMUSG00000025745;IPI00223092;Q8BMS1;Q3TCY3;Q5U5Y5;Q8QZU4 xxxxx	41	42	16	50	-0.333205
sp|P10107|ANXA1_MOUSE - Anxa1 Annexin A1 [REVIEWED] ENSMUSG00000024659;IPI00230395;P10107 xxxxx	45	52	18	50	-0.530616
sp|Q7TMB8|CYFP1_MOUSE - Cyfip1 Cytoplasmic FMR1-interacting protein 1 [REVIEWED] ENSMUSG00000030447;IPI00831544;Q7TMB8;O88558;Q3U7Q7;Q5DU50;Q7TSZ5;Q80VN6;Q8CE85;Q99LY1 xxxxx	22	32	17	49	0.245358
sp|P08113|ENPL_MOUSE - Hsp90b1 Endoplasmin [REVIEWED] ENSMUSG00000020048;IPI00129526;P08113;P11427 xxxxx	32	59	51	49	0.228822
sp|P40142|TKT_MOUSE - Tkt Transketolase [REVIEWED] ENSMUSG00000021957;IPI00137409;P40142;Q3U7Y1;Q3UK62;Q545A1;Q9ESA0 xxxxx	58	52	20	49	-0.699553
sp|P27659|RL3_MOUSE - Rpl3 60S ribosomal protein L3 [REVIEWED] ENSMUSG00000057111;ENSMUSG00000060036;IPI00321170;P27659;O89071;Q91VJ6 xxxxx	16	38	3	48	-0.0423123
sp|P06745|G6PI_MOUSE - Gpi Glucose-6-phosphate isomerase [REVIEWED] ENSMUSG00000036427;IPI00228633;P06745;O89062;Q3TEE7;Q3TW50;Q3UUX1;Q3UY84;Q3UZJ1;Q5RJI3;Q8C675;Q9JM07 xxxxx	44	41	18	48	-0.407029
sp|P27773|PDIA3_MOUSE - Pdia3 Protein disulfide-isomerase A3 [REVIEWED] ENSMUSG00000027248;IPI00230108;P27773;Q3TEI9;Q3TIL2;Q3UZK8;Q8C2F4;Q99LF6 xxxxx	88	67	24	47	-0.885635
sp|P06797|CATL1_MOUSE - Ctsl1 Cathepsin L1 [REVIEWED] ENSMUSG00000021477;IPI00128154;P06797;Q91UZ0 xxxxx	7	3	3	46	0.5382
sp|P36423|THAS_MOUSE - Tbxas1 Thromboxane-A synthase [REVIEWED] ENSMUSG00000029925;IPI00322543;P36423;P97505 xxxxx	0	54	26	46	0.215821
sp|E9Q555|RN213_MOUSE - Rnf213 E3 ubiquitin-protein ligase RNF213 [REVIEWED] ENSMUSG00000070327;IPI00889205;E9Q555;Q8BVK6 xxxxx	14	70	12	46	-0.270189
sp|P97821|CATC_MOUSE - Ctsc Dipeptidyl peptidase 1 [REVIEWED] ENSMUSG00000030560;IPI00130015;P97821;O08853 xxxxx	4	0	3	45	0.593512
sp|Q8C3J5|DOCK2_MOUSE - Dock2 Dedicator of cytokinesis protein 2 [REVIEWED] ENSMUSG00000020143;IPI00117274;Q8C3J5;Q5SRI4;Q99M79 xxxxx	23	41	14	45	-0.0981525
sp|Q61830|MRC1_MOUSE - Mrc1 Macrophage mannose receptor 1 [REVIEWED] ENSMUSG00000026712;IPI00126186;Q61830;Q8C502 xxxxx	38	29	23	44	0
sp|Q922F4|TBB6_MOUSE - Tubb6 Tubulin beta-6 chain [REVIEWED] ENSMUSG00000001473;IPI00122928;Q922F4 xxxxx	0	89	16	44	-0.214662
sp|P09411|PGK1_MOUSE - Pgk1 Phosphoglycerate kinase 1 [REVIEWED] ENSMUSG00000069008;ENSMUSG00000062070;ENSMUSG00000066632;IPI00555069;P09411;Q3TPE6;Q3UKV8;Q5XJE7 xxxxx	74	75	52	44	-0.977634
sp|Q3U7R1|ESYT1_MOUSE - Esyt1 Extended synaptotagmin-1 [REVIEWED] ENSMUSG00000025366;IPI00756325;Q3U7R1;Q8C8R1;Q91X62;Q9CVH0;Q9Z1X5;Q9Z1X6 xxxxx	27	34	16	43	-0.050637
sp|P11499|HS90B_MOUSE - Hsp90ab1 Heat shock protein HSP 90-beta [REVIEWED] ENSMUSG00000023944;IPI00554929;P11499;O89078;Q3UIQ7 xxxxx	23	67	16	43	-0.390843
sp|P48036|ANXA5_MOUSE - Anxa5 Annexin A5 [REVIEWED] ENSMUSG00000027712;IPI00317309;P48036;Q3U5Q1;Q3U5X4;Q3U8K1;Q3UGV0;Q99LA1 xxxxx	85	98	42	43	-0.982756
sp|Q9JJZ2|TBA8_MOUSE - Tuba8 Tubulin alpha-8 chain [REVIEWED] ENSMUSG00000030137;IPI00311175;Q9JJZ2;D4P911;Q9CV57 xxxxx	0	40	11	42	0.178721
sp|P17742|PPIA_MOUSE - Ppia Peptidyl-prolyl cis-trans isomerase A [REVIEWED] ENSMUSG00000059583;ENSMUSG00000062933;ENSMUSG00000071866;IPI00554989;P17742;Q9CWJ5;Q9R137 xxxxx	36	70	8	42	-0.635707
sp|Q60597|ODO1_MOUSE - Ogdh 2-oxoglutarate dehydrogenase, mitochondrial [REVIEWED] ENSMUSG00000020456;IPI00845652;Q60597;Q3UDM7;Q5DTI4;Q5SVX7;Q5SVX9;Q6PFZ2;Q80Y57;Q8K0K7;Q8K2Z3;Q8R3M2;Q91WP2 xxxxx	39	39	10	41	-0.524395
sp|P97449|AMPN_MOUSE - Anpep Aminopeptidase N [REVIEWED] ENSMUSG00000039062;IPI00319509;P97449;Q91YH8;Q99K63 xxxxx	53	48	12	40	-0.772925
sp|P35700|PRDX1_MOUSE - Prdx1 Peroxiredoxin-1 [REVIEWED] ENSMUSG00000028691;IPI00121788;P35700;Q3UBV4;Q9CWI2 xxxxx	57	93	39	40	-0.812557
sp|P62880|GBB2_MOUSE - Gnb2 Guanine nucleotide-binding protein G(I)/G(S)/G(T) subunit beta-2 [REVIEWED] ENSMUSG00000029713;IPI00162780;P62880;P11016;P54312 xxxxx	43	39	15	39	-0.631169
sp|Q9ERD7|TBB3_MOUSE - Tubb3 Tubulin beta-3 chain [REVIEWED] ENSMUSG00000062380;IPI00112251;Q9ERD7;Q3UF42;Q5I036 xxxxx	11	0	0	38	0.434637
sp|P20060|HEXB_MOUSE - Hexb Beta-hexosaminidase subunit beta [REVIEWED] ENSMUSG00000021665;IPI00115530;P20060 xxxxx	17	22	16	38	0.425457
sp|P40124|CAP1_MOUSE - Cap1 Adenylyl cyclase-associated protein 1 [REVIEWED] ENSMUSG00000028656;IPI00137331;P40124;Q8BPT7 xxxxx	37	42	41	38	0
sp|P19096|FAS_MOUSE - Fasn Fatty acid synthase [REVIEWED] ENSMUSG00000025153;IPI00113223;P19096;B1ATU8;Q6PB72;Q8C4Z0;Q9EQR0 xxxxx	19	31	7	38	-0.105762
sp|Q8BLF1|NCEH1_MOUSE - Nceh1 Neutral cholesterol ester hydrolase 1 [REVIEWED] ENSMUSG00000027698;IPI00403586;Q8BLF1;Q69ZL0;Q8BZK3 xxxxx	25	39	16	38	-0.261712
sp|P63038|CH60_MOUSE - Hspd1 60 kDa heat shock protein, mitochondrial [REVIEWED] ENSMUSG00000025980;IPI00845678;P63038;P19226;P19227;P97602;Q3KQP2;Q3UIP0;Q8C2C7;Q8VEF4 xxxxx	8	18	33	37	0.944981
sp|P06800|PTPRC_MOUSE - Ptprc Receptor-type tyrosine-protein phosphatase C [REVIEWED] ENSMUSG00000026395;IPI00461132;P06800;E9QLT5;Q61812;Q61813;Q61814;Q61815;Q78EF1 xxxxx	19	21	6	37	0.0681291
sp|Q8R1F1|NIBL1_MOUSE - Fam129b Niban-like protein 1 [REVIEWED] ENSMUSG00000026796;IPI00330695;Q8R1F1;Q3TCV6;Q3U8I3;Q3UC84;Q3UDW4;Q3UIE4;Q543S7;Q8BQ71;Q8CC78 xxxxx	30	27	3	35	-0.385673
sp|Q99KI0|ACON_MOUSE - Aco2 Aconitate hydratase, mitochondrial [REVIEWED] ENSMUSG00000022477;IPI00116074;Q99KI0;Q3UDK9;Q3ULG9;Q3UNH7;Q505P4 xxxxx	51	41	33	35	-0.857143
sp|Q99JY9|ARP3_MOUSE - Actr3 Actin-related protein 3 [REVIEWED] ENSMUSG00000026341;IPI00115627;Q99JY9;Q9DC56 xxxxx	60	71	25	35	-0.958847
sp|Q5SWU9|ACACA_MOUSE - Acaca Acetyl-CoA carboxylase 1 [REVIEWED] ENSMUSG00000020532;IPI00848443;Q5SWU9;A2A6H4;Q5SWU6;Q5SWU7;Q5SWU8;Q6JIZ1;Q6PHL9;Q705X8;Q705X9;Q91VC8;Q925C4;Q925C5 xxxxx	79	70	23	35	-0.973889
sp|Q60854|SPB6_MOUSE - Serpinb6 Serpin B6 [REVIEWED] ENSMUSG00000060147;IPI00121471;Q60854 xxxxx	14	15	17	34	0.674453
sp|Q91VI7|RINI_MOUSE - Rnh1 Ribonuclease inhibitor [REVIEWED] ENSMUSG00000038650;IPI00313296;Q91VI7;Q924P4 xxxxx	37	32	17	34	-0.583383
sp|Q7TPR4|ACTN1_MOUSE - Actn1 Alpha-actinin-1 [REVIEWED] ENSMUSG00000015143;IPI00380436;Q7TPR4 xxxxx	38	32	10	34	-0.596481
sp|P62874|GBB1_MOUSE - Gnb1 Guanine nucleotide-binding protein G(I)/G(S)/G(T) subunit beta-1 [REVIEWED] ENSMUSG00000029064;IPI00120716;P62874;P04697;P04901 xxxxx	33	28	14	33	-0.449977
sp|P07356|ANXA2_MOUSE - Anxa2 Annexin A2 [REVIEWED] ENSMUSG00000032231;IPI00468203;P07356 xxxxx	41	29	12	33	-0.590076
sp|P26443|DHE3_MOUSE - Glud1 Glutamate dehydrogenase 1, mitochondrial [REVIEWED] ENSMUSG00000021794;IPI00114209;P26443;Q8C273 xxxxx	38	50	11	33	-0.778792
sp|P14824|ANXA6_MOUSE - Anxa6 Annexin A6 [REVIEWED] ENSMUSG00000018340;IPI00554894;P14824;Q8BSS4 xxxxx	26	15	2	32	-0.153081
sp|P51881|ADT2_MOUSE - Slc25a5 ADP/ATP translocase 2 [REVIEWED] ENSMUSG00000016319;IPI00127841;P51881;Q61311 xxxxx	23	37	24	32	-0.172774
sp|P05202|AATM_MOUSE - Got2 Aspartate aminotransferase, mitochondrial [REVIEWED] ENSMUSG00000031672;IPI00117312;P05202;O09188;Q3TIP6;Q3UD91;Q5HZH5 xxxxx	18	29	7	32	-0.202808
sp|P18242|CATD_MOUSE - Ctsd Cathepsin D [REVIEWED] ENSMUSG00000007891;IPI00111013;P18242 xxxxx	87	38	20	32	-0.715171
sp|P09103|PDIA1_MOUSE - P4hb Protein disulfide-isomerase [REVIEWED] ENSMUSG00000025130;IPI00133522;P09103;Q922C8 xxxxx	34	48	5	32	-0.722897
sp|Q8K2B3|DHSA_MOUSE - Sdha Succinate dehydrogenase [ubiquinone] flavoprotein subunit, mitochondrial [REVIEWED] ENSMUSG00000021577;IPI00230351;Q8K2B3;Q0QF19;Q3UH25;Q3UKP7;Q3V4B1;Q921P5;Q9Z1Z4 xxxxx	37	35	22	32	-0.780399
sp|Q99JI6|RAP1B_MOUSE - Rap1b Ras-related protein Rap-1b [REVIEWED] ENSMUSG00000052681;IPI00407954;Q99JI6 xxxxx	21	26	9	31	-0.214297
sp|P61161|ARP2_MOUSE - Actr2 Actin-related protein 2 [REVIEWED] ENSMUSG00000020152;IPI00177038;P61161;O15142;Q6PI31 xxxxx	23	20	3	31	-0.220432
sp|P37040|NCPR_MOUSE - Por NADPH--cytochrome P450 reductase [REVIEWED] ENSMUSG00000005514;IPI00621548;P37040 xxxxx	46	33	30	31	-0.698535
sp|Q3TRM8|HXK3_MOUSE - Hk3 Hexokinase-3 [REVIEWED] ENSMUSG00000025877;IPI00751595;Q3TRM8;Q3TAX6;Q3UDP1;Q3UEA4 xxxxx	34	37	13	31	-0.722897
sp|P29416|HEXA_MOUSE - Hexa Beta-hexosaminidase subunit alpha [REVIEWED] ENSMUSG00000025232;IPI00125522;P29416;Q64246;Q91XG3 xxxxx	47	34	3	31	-0.732678
sp|Q9D1A2|CNDP2_MOUSE - Cndp2 Cytosolic non-specific dipeptidase [REVIEWED] ENSMUSG00000024644;IPI00315879;Q9D1A2;Q3TA80;Q3TI32;Q3U7B9;Q99PV1 xxxxx	70	43	20	31	-0.832684
sp|Q8BHN3|GANAB_MOUSE - Ganab Neutral alpha-glucosidase AB [REVIEWED] ENSMUSG00000071650;IPI00421253;Q8BHN3;O08794;Q149A6;Q80U81;Q9CS53 xxxxx	18	13	5	30	0.110264
sp|Q9D8E6|RL4_MOUSE - Rpl4 60S ribosomal protein L4 [REVIEWED] ENSMUSG00000032399;IPI00111412;Q9D8E6;Q9CY08 xxxxx	21	17	7	30	-0.0302752
sp|P24270|CATA_MOUSE - Cat Catalase [REVIEWED] ENSMUSG00000027187;IPI00312058;P24270;Q3TXQ6 xxxxx	19	23	7	30	-0.149738
sp|Q8CIE6|COPA_MOUSE - Copa Coatomer subunit alpha [REVIEWED] ENSMUSG00000026553;IPI00229834;Q8CIE6;E9Q075 xxxxx	29	32	5	30	-0.589692
sp|Q9WV54|ASAH1_MOUSE - Asah1 Acid ceramidase [REVIEWED] ENSMUSG00000031591;IPI00125266;Q9WV54 xxxxx	36	46	16	30	-0.828517
sp|P62908|RS3_MOUSE - Rps3 40S ribosomal protein S3 [REVIEWED] ENSMUSG00000030744;IPI00134599;P62908;P17073;P47933 xxxxx	15	11	3	29	0.159223
tr|E9Q616|E9Q616_MOUSE - Ahnak Protein Ahnak [NOT_REVIEWED] ENSMUSG00000069833;IPI00553798;E9Q616 xxxxx	0	50	0	29	-0.248821
sp|Q9CVB6|ARPC2_MOUSE - Arpc2 Actin-related protein 2/3 complex subunit 2 [REVIEWED] ENSMUSG00000006304;IPI00661414;Q9CVB6;Q3U870 xxxxx	16	28	3	29	-0.284108
sp|Q03265|ATPA_MOUSE - Atp5a1 ATP synthase subunit alpha, mitochondrial [REVIEWED] ENSMUSG00000025428;IPI00130280;Q03265;Q3TFN0;Q3THN8;Q3TPR0;Q3TPV3;Q3TZU3;Q3UIR7;Q543Y6 xxxxx	38	42	9	29	-0.824322
sp|Q61549|EMR1_MOUSE - Emr1 EGF-like module-containing mucin-like hormone receptor-like 1 [REVIEWED] ENSMUSG00000004730;IPI00122411;Q61549 xxxxx	0	5	0	28	0.496377
sp|Q9WUU7|CATZ_MOUSE - Ctsz Cathepsin Z [REVIEWED] ENSMUSG00000016256;IPI00986833;Q9WUU7 xxxxx	21	23	4	28	-0.332309
sp|Q8VEK3|HNRPU_MOUSE - Hnrnpu Heterogeneous nuclear ribonucleoprotein U [REVIEWED] ENSMUSG00000039630;IPI00458583;Q8VEK3 xxxxx	21	29	6	28	-0.435143
sp|P15864|H12_MOUSE - Hist1h1c Histone H1.2 [REVIEWED] ENSMUSG00000036181;IPI00223713;P15864 xxxxx	0	0	0	27	0.57735
tr|O88325|O88325_MOUSE - Naglu Alpha-N-acetylglucosaminidase (Sanfilippo disease IIIB), isoform CRA_b [NOT_REVIEWED] ENSMUSG00000001751;IPI00314726;O88325 xxxxx	29	17	6	27	-0.355266
sp|Q00519|XDH_MOUSE - Xdh Xanthine dehydrogenase/oxidase [REVIEWED] ENSMUSG00000024066;IPI00352984;Q00519;E9QLM9 xxxxx	26	34	11	27	-0.656205
sp|Q9Z1Q5|CLIC1_MOUSE - Clic1 Chloride intracellular channel protein 1 [REVIEWED] ENSMUSG00000007041;IPI00130344;Q9Z1Q5 xxxxx	18	8	0	26	0
tr|G3X922|G3X922_MOUSE - Dnajc13 Protein Dnajc13 [NOT_REVIEWED] ENSMUSG00000032560;;G3X922 xxxxx	17	20	7	26	-0.145479
sp|Q62465|VAT1_MOUSE - Vat1 Synaptic vesicle membrane protein VAT-1 homolog [REVIEWED] ENSMUSG00000034993;IPI00126072;Q62465;Q8R3G0;Q8R3T8 xxxxx	17	35	21	26	-0.185952
sp|Q9DBJ1|PGAM1_MOUSE - Pgam1 Phosphoglycerate mutase 1 [REVIEWED] ENSMUSG00000069106;ENSMUSG00000066695;ENSMUSG00000011752;IPI00457898;Q9DBJ1;Q9D6W0;Q9ERT3 xxxxx	17	24	10	26	-0.198419
tr|A6ZI46|A6ZI46_MOUSE - Aldoart1 Fructose-bisphosphate aldolase [NOT_REVIEWED] ENSMUSG00000059343;IPI00856272;A6ZI46 xxxxx	27	16	0	26	-0.391763
sp|P62962|PROF1_MOUSE - Pfn1 Profilin-1 [REVIEWED] ENSMUSG00000018293;IPI00224740;P62962;P10924 xxxxx	32	55	37	26	-0.554109
sp|Q62192|CD180_MOUSE - Cd180 CD180 antigen [REVIEWED] ENSMUSG00000021624;IPI00343568;Q62192;Q8C251 xxxxx	26	27	10	26	-0.599917
sp|Q60710|SAMH1_MOUSE - Samhd1 SAM domain and HD domain-containing protein 1 [REVIEWED] ENSMUSG00000027639;IPI00120095;Q60710;Q3U5X2;Q543A4;Q91VK8 xxxxx	38	38	29	26	-0.980196
sp|Q9JMH6|TRXR1_MOUSE - Txnrd1 Thioredoxin reductase 1, cytoplasmic [REVIEWED] ENSMUSG00000020250;IPI00776252;Q9JMH6;Q3UEB7;Q3UK84;Q8CI31;Q99P49;Q9CSV5 xxxxx	14	16	9	25	0.172774
sp|P51150|RAB7A_MOUSE - Rab7a Ras-related protein Rab-7a [REVIEWED] ENSMUSG00000079477;IPI00408892;P51150 xxxxx	30	14	6	25	-0.347068
sp|P07901|HS90A_MOUSE - Hsp90aa1 Heat shock protein HSP 90-alpha [REVIEWED] ENSMUSG00000021270;IPI00330804;P07901 xxxxx	31	41	5	25	-0.798878
sp|O89053|COR1A_MOUSE - Coro1a Coronin-1A [REVIEWED] ENSMUSG00000030707;IPI00323600;O89053;Q7TMU0;Q9R1Y8;Q9R288 xxxxx	52	41	6	25	-0.894148
sp|Q05920|PYC_MOUSE - Pc Pyruvate carboxylase, mitochondrial [REVIEWED] ENSMUSG00000024892;IPI00943457;Q05920 xxxxx	121	113	30	25	-0.997234
sp|Q93092|TALDO_MOUSE - Taldo1 Transaldolase [REVIEWED] ENSMUSG00000025503;IPI00124692;Q93092;P70358;P70703;Q52KM4 xxxxx	15	13	6	24	0.0778499
sp|O08553|DPYL2_MOUSE - Dpysl2 Dihydropyrimidinase-related protein 2 [REVIEWED] ENSMUSG00000022048;IPI00114375;O08553;Q6P5D0 xxxxx	34	21	9	24	-0.616849
sp|P97429|ANXA4_MOUSE - Anxa4 Annexin A4 [REVIEWED] ENSMUSG00000029994;IPI00353727;P97429;Q3UCL0 xxxxx	41	26	6	24	-0.744933
sp|P08752|GNAI2_MOUSE - Gnai2 Guanine nucleotide-binding protein G(i) subunit alpha-2 [REVIEWED] ENSMUSG00000032562;IPI00228617;P08752;Q3TXK7;Q6P1C0 xxxxx	37	38	7	24	-0.877197
sp|P56480|ATPB_MOUSE - Atp5b ATP synthase subunit beta, mitochondrial [REVIEWED] ENSMUSG00000025393;IPI00468481;P56480;Q0QEP4;Q3TFD7;Q3TIP9;Q3TK44;Q3TWD5;Q3TX28;Q3U6U4;Q3U774;Q3UB69;Q3UF69;Q8CI65;Q8VEJ5;Q9CTI7;Q9CWX7 xxxxx	13	16	15	23	0.597351
sp|Q9WVA4|TAGL2_MOUSE - Tagln2 Transgelin-2 [REVIEWED] ENSMUSG00000026547;IPI00125778;Q9WVA4;Q3TIB8;Q6A0C6;Q78ZX2;Q91VU2 xxxxx	24	27	47	23	0.485586
sp|Q5SUA5|MYO1G_MOUSE - Myo1g Unconventional myosin-Ig [REVIEWED] ENSMUSG00000020437;IPI00387204;Q5SUA5;Q8BIT8;Q8BJ17;Q8BJ65;Q8R019;Q91ZI1 xxxxx	12	10	6	23	0.277787
sp|P06151|LDHA_MOUSE - Ldha L-lactate dehydrogenase A chain [REVIEWED] ENSMUSG00000063229;IPI00319994;P06151 xxxxx	20	27	26	23	0.182574
sp|Q9Z1G4|VPP1_MOUSE - Atp6v0a1 V-type proton ATPase 116 kDa subunit a isoform 1 [REVIEWED] ENSMUSG00000019302;IPI00828950;Q9Z1G4;A2A5A1;Q9JHJ4;Q9JL13;Q9JL14 xxxxx	19	12	8	23	0
tr|B9EJ86|B9EJ86_MOUSE - Osbpl8 Oxysterol-binding protein [NOT_REVIEWED] ENSMUSG00000020189;IPI00461290;B9EJ86 xxxxx	11	24	3	23	-0.257775
sp|Q8K1B8|URP2_MOUSE - Fermt3 Fermitin family homolog 3 [REVIEWED] ENSMUSG00000024965;IPI00169731;Q8K1B8 xxxxx	13	34	9	23	-0.387427
sp|P17427|AP2A2_MOUSE - Ap2a2 AP-2 complex subunit alpha-2 [REVIEWED] ENSMUSG00000002957;IPI00310131;P17427;Q8C2J5;Q921V0 xxxxx	22	16	0	23	-0.407494
sp|Q8R0X7|SGPL1_MOUSE - Sgpl1 Sphingosine-1-phosphate lyase 1 [REVIEWED] ENSMUSG00000020097;IPI00320480;Q8R0X7;O54955;Q8C942 xxxxx	30	46	2	23	-0.806885
sp|P57780|ACTN4_MOUSE - Actn4 Alpha-actinin-4 [REVIEWED] ENSMUSG00000054808;IPI00118899;P57780 xxxxx	27	27	19	23	-0.904534
sp|P51660|DHB4_MOUSE - Hsd17b4 Peroxisomal multifunctional enzyme type 2 [REVIEWED] ENSMUSG00000024507;IPI00331628;P51660;Q9DBM3 xxxxx	4	8	3	22	0.4279
sp|Q9D0K2|SCOT1_MOUSE - Oxct1 Succinyl-CoA:3-ketoacid coenzyme A transferase 1, mitochondrial [REVIEWED] ENSMUSG00000022186;IPI00132653;Q9D0K2;Q3TIW6;Q9CV92 xxxxx	19	14	9	22	-0.101015
sp|Q3TXS7|PSMD1_MOUSE - Psmd1 26S proteasome non-ATPase regulatory subunit 1 [REVIEWED] ENSMUSG00000026229;IPI00267295;Q3TXS7;B2RRP8 xxxxx	13	17	0	22	-0.245256
tr|Q9JHF5|Q9JHF5_MOUSE - Tcirg1 T-cell, immune regulator 1, ATPase, H+ transporting, lysosomal V0 protein A3, isoform CRA_b [NOT_REVIEWED] ENSMUSG00000001750;IPI00914724;Q9JHF5 xxxxx	21	20	17	22	-0.267261
sp|P29391|FRIL1_MOUSE - Ftl1 Ferritin light chain 1 [REVIEWED] ENSMUSG00000050708;ENSMUSG00000057829;IPI00762203;P29391;Q8WUQ8 xxxxx	39	58	50	22	-0.463042
sp|O08529|CAN2_MOUSE - Capn2 Calpain-2 catalytic subunit [REVIEWED] ENSMUSG00000026509;IPI00308938;O08529;O35518;O54843 xxxxx	29	27	3	22	-0.753859
sp|Q6PIC6|AT1A3_MOUSE - Atp1a3 Sodium/potassium-transporting ATPase subunit alpha-3 [REVIEWED] ENSMUSG00000040907;IPI00122048;Q6PIC6 xxxxx	27	24	15	22	-0.792594
sp|P17751|TPIS_MOUSE - Tpi1 Triosephosphate isomerase [REVIEWED] ENSMUSG00000023456;IPI00988063;P17751;Q3TJH2;Q3UC04;Q3UKG9;Q64513;Q9CVF9;Q9CWE7 xxxxx	36	45	30	22	-0.862316
sp|P62267|RS23_MOUSE - Rps23 40S ribosomal protein S23 [REVIEWED] ENSMUSG00000049517;ENSMUSG00000063001;IPI00972920;P62267;P39028;Q542K7 xxxxx	0	5	4	21	0.623783
tr|Q8K1X4|Q8K1X4_MOUSE - Nckap1l NCK associated protein 1 like [NOT_REVIEWED] ENSMUSG00000022488;IPI00169846;Q8K1X4 xxxxx	5	13	5	21	0.301511
sp|Q9Z1Q9|SYVC_MOUSE - Vars Valine--tRNA ligase [REVIEWED] ENSMUSG00000007029;IPI00130353;Q9Z1Q9;Q9QUN2 xxxxx	14	14	9	21	0.117041
sp|Q9QXX4|CMC2_MOUSE - Slc25a13 Calcium-binding mitochondrial carrier protein Aralar2 [REVIEWED] ENSMUSG00000015112;IPI00135651;Q9QXX4;Q9CZF6;Q9DCF5 xxxxx	10	23	13	21	0.0462745
sp|P11835|ITB2_MOUSE - Itgb2 Integrin beta-2 [REVIEWED] ENSMUSG00000000290;IPI00320605;P11835;Q64482 xxxxx	27	27	13	21	-0.870388
sp|Q99LR1|ABD12_MOUSE - Abhd12 Monoacylglycerol lipase ABHD12 [REVIEWED] ENSMUSG00000032046;IPI00165731;Q99LR1;A2ANB4;Q99M06 xxxxx	31	29	17	21	-0.961074
sp|Q9CPW4|ARPC5_MOUSE - Arpc5 Actin-related protein 2/3 complex subunit 5 [REVIEWED] ENSMUSG00000008475;IPI00399943;Q9CPW4;Q3U9T3;Q9D8E7 xxxxx	6	14	14	20	0.703526
sp|Q61207|SAP_MOUSE - Psap Sulfated glycoprotein 1 [REVIEWED] ENSMUSG00000004207;IPI00321190;Q61207;Q60861;Q64006;Q64219 xxxxx	10	16	13	20	0.473016
sp|Q8CGC7|SYEP_MOUSE - Eprs Bifunctional glutamate/proline--tRNA ligase [REVIEWED] ENSMUSG00000026615;IPI00339916;Q8CGC7;E9QKC4;Q3UFJ2;Q4VC16 xxxxx	4	17	4	20	0.102359
sp|Q99KC8|VMA5A_MOUSE - Vwa5a von Willebrand factor A domain-containing protein 5A [REVIEWED] ENSMUSG00000023186;IPI00221817;Q99KC8;Q3TTU2;Q3UVU1;Q3V3F2;Q6UN22;Q8BHA8;Q9CTV9 xxxxx	12	21	13	20	0
sp|Q8BMF4|ODP2_MOUSE - Dlat Dihydrolipoyllysine-residue acetyltransferase component of pyruvate dehydrogenase complex, mitochondrial [REVIEWED] ENSMUSG00000000168;IPI00153660;Q8BMF4;Q8K2G8;Q8R339;Q91ZB1 xxxxx	4	33	13	20	-0.0943858
sp|Q9EQK5|MVP_MOUSE - Mvp Major vault protein [REVIEWED] ENSMUSG00000030681;IPI00986977;Q9EQK5;Q922X6 xxxxx	10	13	0	20	-0.10432
sp|Q8VEM8|MPCP_MOUSE - Slc25a3 Phosphate carrier protein, mitochondrial [REVIEWED] ENSMUSG00000061904;IPI00124771;Q8VEM8;Q542V7 xxxxx	28	35	13	20	-0.906183
tr|D3YU93|D3YU93_MOUSE - Rpl7a-ps3 Uncharacterized protein [NOT_REVIEWED] ENSMUSG00000068579;IPI00265107;D3YU93 xxxxx	10	0	6	19	0.543036
tr|F6U2H0|F6U2H0_MOUSE - Rpl7a-ps5 Uncharacterized protein [NOT_REVIEWED] ENSMUSG00000071052;IPI00462006;F6U2H0 xxxxx	10	0	6	19	0.543036
sp|Q8BIJ6|SYIM_MOUSE - Iars2 Isoleucine--tRNA ligase, mitochondrial [REVIEWED] ENSMUSG00000026618;IPI00453499;Q8BIJ6;Q3TKT8;Q8BIJ0;Q8BIP3 xxxxx	2	8	4	19	0.494543
sp|Q64282|IFIT1_MOUSE - Ifit1 Interferon-induced protein with tetratricopeptide repeats 1 [REVIEWED] ENSMUSG00000034459;IPI00132290;Q64282;Q99L77 xxxxx	3	4	0	19	0.407307
tr|D3Z3R0|D3Z3R0_MOUSE - Gm16477 Uncharacterized protein [NOT_REVIEWED] ENSMUSG00000062758;IPI00622160;D3Z3R0 xxxxx	10	12	6	19	0.159223
sp|Q8VCT3|AMPB_MOUSE - Rnpep Aminopeptidase B [REVIEWED] ENSMUSG00000041926;IPI00122529;Q8VCT3;Q3TX27 xxxxx	9	6	0	19	0.145479
sp|Q9DBG3|AP2B1_MOUSE - Ap2b1 AP-2 complex subunit beta [REVIEWED] ENSMUSG00000035152;IPI00378063;Q9DBG3;Q80XJ4 xxxxx	11	16	7	19	-0.0543125
tr|D3YVE6|D3YVE6_MOUSE - Uncharacterized protein [NOT_REVIEWED] ENSMUSG00000094089;;D3YVE6 xxxxx	10	12	0	19	-0.110357
sp|P14901|HMOX1_MOUSE - Hmox1 Heme oxygenase 1 [REVIEWED] ENSMUSG00000005413;IPI00131577;P14901 xxxxx	11	18	4	19	-0.248282
sp|P80313|TCPH_MOUSE - Cct7 T-complex protein 1 subunit eta [REVIEWED] ENSMUSG00000030007;IPI00331174;P80313 xxxxx	23	10	6	19	-0.294086
sp|P99029|PRDX5_MOUSE - Prdx5 Peroxiredoxin-5, mitochondrial [REVIEWED] ENSMUSG00000024953;IPI00759999;P99029;Q9QX45;Q9QZ75 xxxxx	14	24	10	19	-0.427603
sp|P68040|GBLP_MOUSE - Gnb2l1 Guanine nucleotide-binding protein subunit beta-2-like 1 [REVIEWED] ENSMUSG00000020372;IPI00317740;P68040;P25388;P99049;Q3THP0;Q3THY7;Q3TKQ0;Q3TW88;Q5NCC5;Q5NCC6;Q9CSQ0;Q9ERM6 xxxxx	15	21	9	19	-0.436436
sp|Q9D8N0|EF1G_MOUSE - Eef1g Elongation factor 1-gamma [REVIEWED] ENSMUSG00000071644;IPI00318841;Q9D8N0;Q920C5;Q9CRT5;Q9CSU3;Q9D004 xxxxx	23	15	3	19	-0.534522
sp|Q9R0P3|ESTD_MOUSE - Esd S-formylglutathione hydrolase [REVIEWED] ENSMUSG00000021996;IPI00109142;Q9R0P3;Q80ZX4;Q9CWI4 xxxxx	28	27	7	19	-0.862316
sp|Q9CPR4|RL17_MOUSE - Rpl17 60S ribosomal protein L17 [REVIEWED] ENSMUSG00000062328;ENSMUSG00000067748;IPI00453768;Q9CPR4 xxxxx	3	4	0	18	0.396155
sp|P54071|IDHP_MOUSE - Idh2 Isocitrate dehydrogenase [NADP], mitochondrial [REVIEWED] ENSMUSG00000030541;IPI00318614;P54071;Q8C2R9;Q9EQK1 xxxxx	9	8	3	18	0.1849
sp|P61205|ARF3_MOUSE - Arf3 ADP-ribosylation factor 3 [REVIEWED] ENSMUSG00000051853;IPI00221614;P61205;P16587 xxxxx	14	0	0	18	0.123091
sp|P84078|ARF1_MOUSE - Arf1 ADP-ribosylation factor 1 [REVIEWED] ENSMUSG00000048076;IPI00221613;P84078;P10947;P32889;Q3THZ2;Q3U849;Q3UDG1;Q3UF76 xxxxx	14	0	0	18	0.123091
sp|Q9QWR8|NAGAB_MOUSE - Naga Alpha-N-acetylgalactosaminidase [REVIEWED] ENSMUSG00000022453;IPI00315593;Q9QWR8;O88620;Q8R437;Q8VDK2 xxxxx	13	8	5	18	0.101015
sp|P51569|AGAL_MOUSE - Gla Alpha-galactosidase A [REVIEWED] ENSMUSG00000031266;IPI00123814;P51569 xxxxx	17	6	7	18	0.0905357
sp|Q9CZ13|QCR1_MOUSE - Uqcrc1 Cytochrome b-c1 complex subunit 1, mitochondrial [REVIEWED] ENSMUSG00000025651;IPI00111885;Q9CZ13;Q3TV75;Q9CWL6 xxxxx	11	15	0	18	-0.293294
sp|P05555|ITAM_MOUSE - Itgam Integrin alpha-M [REVIEWED] ENSMUSG00000030786;IPI00876475;P05555;Q8CA73 xxxxx	16	23	7	18	-0.604708
tr|Q9CZN7|Q9CZN7_MOUSE - Shmt2 Protein Shmt2 [NOT_REVIEWED] ENSMUSG00000025403;IPI00454008;Q9CZN7 xxxxx	9	5	7	17	0.548821
sp|P26043|RADI_MOUSE - Rdx Radixin [REVIEWED] ENSMUSG00000032050;IPI00308324;P26043;Q3TS85;Q9QW27 xxxxx	26	0	23	17	0.347833
sp|Q62230|SN_MOUSE - Siglec1 Sialoadhesin [REVIEWED] ENSMUSG00000027322;IPI01027499;Q62230;D3YVZ3;D3YVZ4;O55216;Q62228;Q62229 xxxxx	16	8	11	17	0.272166
sp|Q80X95|RRAGA_MOUSE - Rraga Ras-related GTP-binding protein A [REVIEWED] ENSMUSG00000070934;IPI00229392;Q80X95;B1AXR0;Q8C1S2;Q8CFU3 xxxxx	6	6	0	17	0.203616
sp|O35405|PLD3_MOUSE - Pld3 Phospholipase D3 [REVIEWED] ENSMUSG00000003363;IPI00130624;O35405;Q3U5M5 xxxxx	6	8	0	17	0.122988
sp|Q99JY0|ECHB_MOUSE - Hadhb Trifunctional enzyme subunit beta, mitochondrial [REVIEWED] ENSMUSG00000059447;ENSMUSG00000063684;IPI00115607;Q99JY0;Q3TEH9;Q8BJI5;Q8BJM0;Q8BK52 xxxxx	7	12	3	17	0.0475114
sp|O55029|COPB2_MOUSE - Copb2 Coatomer subunit beta' [REVIEWED] ENSMUSG00000032458;IPI00115097;O55029;Q3U5Z9 xxxxx	12	7	0	17	-0.0795557
sp|P48962|ADT1_MOUSE - Slc25a4 ADP/ATP translocase 1 [REVIEWED] ENSMUSG00000031633;IPI00115564;P48962;Q62164 xxxxx	14	19	12	17	-0.371391
sp|Q8BG07|PLD4_MOUSE - Pld4 Phospholipase D4 [REVIEWED] ENSMUSG00000052160;IPI00831033;Q8BG07;Q3TD59;Q3UA19;Q6PDR0;Q8BR69 xxxxx	18	10	0	17	-0.382507
sp|Q9EQH3|VPS35_MOUSE - Vps35 Vacuolar protein sorting-associated protein 35 [REVIEWED] ENSMUSG00000031696;IPI00111181;Q9EQH3;Q61123 xxxxx	14	19	3	17	-0.525924
sp|P60843|IF4A1_MOUSE - Eif4a1 Eukaryotic initiation factor 4A-I [REVIEWED] ENSMUSG00000059796;ENSMUSG00000064241;IPI00118676;P60843;P04765;Q61516 xxxxx	20	19	6	17	-0.715542
sp|P08249|MDHM_MOUSE - Mdh2 Malate dehydrogenase, mitochondrial [REVIEWED] ENSMUSG00000019179;IPI00323592;P08249;Q0QF44;Q8CF79;Q8R1P0 xxxxx	50	27	11	17	-0.824607
sp|Q00612|G6PD1_MOUSE - G6pdx Glucose-6-phosphate 1-dehydrogenase X [REVIEWED] ENSMUSG00000031400;IPI00228385;Q00612 xxxxx	25	25	3	17	-0.834622
sp|P14148|RL7_MOUSE - Rpl7 60S ribosomal protein L7 [REVIEWED] ENSMUSG00000043716;IPI00311236;P14148;Q80UR0 xxxxx	6	11	10	16	0.631676
sp|P28867|KPCD_MOUSE - Prkcd Protein kinase C delta type [REVIEWED] ENSMUSG00000021948;IPI00227880;P28867;Q91V85;Q9Z333 xxxxx	0	4	0	16	0.457496
sp|Q3UQ44|IQGA2_MOUSE - Iqgap2 Ras GTPase-activating-like protein IQGAP2 [REVIEWED] ENSMUSG00000021676;IPI00406193;Q3UQ44 xxxxx	12	19	21	16	0.442326
sp|Q99K51|PLST_MOUSE - Pls3 Plastin-3 [REVIEWED] ENSMUSG00000016382;IPI00115528;Q99K51;B1AX56;Q3TUZ5 xxxxx	6	0	0	16	0.38236
sp|O35643|AP1B1_MOUSE - Ap1b1 AP-1 complex subunit beta-1 [REVIEWED] ENSMUSG00000009090;IPI00346965;O35643;Q3TXG4;Q922E2 xxxxx	7	13	9	16	0.358057
sp|Q810B6|ANFY1_MOUSE - Ankfy1 Ankyrin repeat and FYVE domain-containing protein 1 [REVIEWED] ENSMUSG00000020790;IPI00329843;Q810B6;B1ATS3;O54807;Q80TG6;Q80UH8 xxxxx	3	7	0	16	0.249136
sp|Q9EQ06|DHB11_MOUSE - Hsd17b11 Estradiol 17-beta-dehydrogenase 11 [REVIEWED] ENSMUSG00000029311;IPI00648201;Q9EQ06;Q3U2P6;Q8BR33;Q8C7S0 xxxxx	6	7	0	16	0.131181
sp|Q8C147|DOCK8_MOUSE - Dock8 Dedicator of cytokinesis protein 8 [REVIEWED] ENSMUSG00000052085;IPI00475383;Q8C147;Q6KAM7;Q6PIS0;Q7TMQ5;Q8CAP6;Q8K105;Q9DBQ2 xxxxx	4	15	5	16	0.0905357
sp|Q6ZQ38|CAND1_MOUSE - Cand1 Cullin-associated NEDD8-dissociated protein 1 [REVIEWED] ENSMUSG00000020114;IPI00896727;Q6ZQ38;Q6PFR0;Q9CV45 xxxxx	3	13	0	16	0
sp|P17710|HXK1_MOUSE - Hk1 Hexokinase-1 [REVIEWED] ENSMUSG00000037012;IPI00759938;P17710;E9PXQ3;Q61659;Q64476;Q64479 xxxxx	22	16	21	16	-0.090167
sp|P62821|RAB1A_MOUSE - Rab1A Ras-related protein Rab-1A [REVIEWED] ENSMUSG00000020149;IPI00114560;P62821;P11476;Q3TX44;Q811M4;Q96N61;Q9Y3T2 xxxxx	11	10	3	16	-0.107833
sp|P29351|PTN6_MOUSE - Ptpn6 Tyrosine-protein phosphatase non-receptor type 6 [REVIEWED] ENSMUSG00000004266;IPI00310909;P29351;O35128;Q63872;Q63873;Q63874;Q921G3;Q9QVA6;Q9QVA7;Q9QVA8;Q9R0V6 xxxxx	14	7	0	16	-0.198419
sp|E9Q634|MYO1E_MOUSE - Myo1e Unconventional myosin-Ie [REVIEWED] ENSMUSG00000032220;IPI00330649;E9Q634;Q80X36;Q91ZI4 xxxxx	8	17	0	16	-0.327544
sp|O35855|BCAT2_MOUSE - Bcat2 Branched-chain-amino-acid aminotransferase, mitochondrial [REVIEWED] ENSMUSG00000030826;IPI00122442;O35855;Q8VD03 xxxxx	19	9	0	16	-0.410152
sp|P47754|CAZA2_MOUSE - Capza2 F-actin-capping protein subunit alpha-2 [REVIEWED] ENSMUSG00000015733;IPI00111265;P47754 xxxxx	14	22	7	16	-0.606788
sp|P62137|PP1A_MOUSE - Ppp1ca Serine/threonine-protein phosphatase PP1-alpha catalytic subunit [REVIEWED] ENSMUSG00000040385;IPI00130185;P62137;P08129;P20653;P22802;Q3U7G7;Q9Z1G2 xxxxx	22	16	3	16	-0.684268
sp|P62259|1433E_MOUSE - Ywhae 14-3-3 protein epsilon [REVIEWED] ENSMUSG00000020849;IPI00118384;P62259;P29360;P42655;Q63631 xxxxx	36	16	5	16	-0.692662
sp|P43276|H15_MOUSE - Hist1h1b Histone H1.5 [REVIEWED] ENSMUSG00000058773;IPI00230133;P43276;Q9CRM8 xxxxx	0	0	0	15	0.57735
tr|Q5RKN9|Q5RKN9_MOUSE - Capza1 Capping protein (Actin filament) muscle Z-line, alpha 1 [NOT_REVIEWED] ENSMUSG00000070372;IPI00877182;Q5RKN9 xxxxx	5	16	12	15	0.348743
sp|P35980|RL18_MOUSE - Rpl18 60S ribosomal protein L18 [REVIEWED] ENSMUSG00000059070;IPI00555113;P35980;Q9CQF1;Q9D987 xxxxx	6	3	0	15	0.267261
sp|Q9QUI0|RHOA_MOUSE - Rhoa Transforming protein RhoA [REVIEWED] ENSMUSG00000007815;IPI00315100;Q9QUI0;O88336 xxxxx	7	4	0	15	0.181818
sp|Q8K411|PREP_MOUSE - Pitrm1 Presequence protease, mitochondrial [REVIEWED] ENSMUSG00000021193;IPI00788353;Q8K411;Q3THC4;Q3TJI1;Q3TPP0;Q3URQ8;Q4KUG2;Q4KUG3;Q6ZPX6;Q922N1;Q9CV63 xxxxx	6	9	0	15	0
tr|G5E829|G5E829_MOUSE - Atp2b1 MCG13663, isoform CRA_a [NOT_REVIEWED] ENSMUSG00000019943;;G5E829 xxxxx	4	12	0	15	-0.0415586
sp|P58681|TLR7_MOUSE - Tlr7 Toll-like receptor 7 [REVIEWED] ENSMUSG00000044583;IPI00122181;P58681;Q923I1 xxxxx	9	12	2	15	-0.20739
tr|Q8BML9|Q8BML9_MOUSE - Qars Glutaminyl-tRNA synthetase [NOT_REVIEWED] ENSMUSG00000032604;IPI00223055;Q8BML9 xxxxx	10	13	4	15	-0.240772
sp|P70168|IMB1_MOUSE - Kpnb1 Importin subunit beta-1 [REVIEWED] ENSMUSG00000001440;IPI00323881;P70168;Q62117;Q6GTI5 xxxxx	14	23	18	15	-0.285714
sp|Q8BWT1|THIM_MOUSE - Acaa2 3-ketoacyl-CoA thiolase, mitochondrial [REVIEWED] ENSMUSG00000036880;IPI00226430;Q8BWT1;Q3TIT9;Q8JZR8 xxxxx	14	8	0	15	-0.292941
sp|Q9WUM3|COR1B_MOUSE - Coro1b Coronin-1B [REVIEWED] ENSMUSG00000024835;IPI00124819;Q9WUM3;Q3UEB1;Q9CVA2 xxxxx	10	18	6	15	-0.380188
sp|Q9WU78|PDC6I_MOUSE - Pdcd6ip Programmed cell death 6-interacting protein [REVIEWED] ENSMUSG00000032504;IPI00468415;Q9WU78;O88695;O89014;Q3TED2;Q8BSL8;Q8R0H5;Q99LR3;Q9QZN8 xxxxx	13	21	6	15	-0.606788
sp|P24452|CAPG_MOUSE - Capg Macrophage-capping protein [REVIEWED] ENSMUSG00000056737;IPI00136906;P24452 xxxxx	17	20	3	15	-0.735683
sp|O88844|IDHC_MOUSE - Idh1 Isocitrate dehydrogenase [NADP] cytoplasmic [REVIEWED] ENSMUSG00000025950;IPI00762452;O88844;Q3UAV7 xxxxx	23	20	10	15	-0.909137
sp|Q8BH04|PCKGM_MOUSE - Pck2 Phosphoenolpyruvate carboxykinase [GTP], mitochondrial [REVIEWED] ENSMUSG00000040618;IPI00223060;Q8BH04;Q8BMM9;Q91Z10 xxxxx	19	18	13	15	-0.943456
sp|Q60605|MYL6_MOUSE - Myl6 Myosin light polypeptide 6 [REVIEWED] ENSMUSG00000090841;ENSMUSG00000060680;IPI00409817;Q60605 xxxxx	30	24	13	15	-0.945611
sp|Q3TCN2|PLBL2_MOUSE - Plbd2 Putative phospholipase B-like 2 [REVIEWED] ENSMUSG00000029598;IPI00845794;Q3TCN2;Q3TD43;Q3TPP8;Q8BHG8;Q8BMB6;Q8BXI3;Q8C0M4;Q8R0V3;Q9DBG4;Q9EQI9 xxxxx	2	10	8	14	0.57735
sp|Q8BMJ2|SYLC_MOUSE - Lars Leucine--tRNA ligase, cytoplasmic [REVIEWED] ENSMUSG00000024493;IPI00453819;Q8BMJ2;Q8BKW9 xxxxx	9	10	6	14	0.0873704
sp|Q9DB77|QCR2_MOUSE - Uqcrc2 Cytochrome b-c1 complex subunit 2, mitochondrial [REVIEWED] ENSMUSG00000030884;IPI00119138;Q9DB77;Q8BK11;Q9CVK7 xxxxx	3	13	2	14	0
sp|Q8VEB4|PAG15_MOUSE - Pla2g15 Group XV phospholipase A2 [REVIEWED] ENSMUSG00000031903;IPI00124428;Q8VEB4;Q3TCB1;Q3U303 xxxxx	7	8	0	14	-0.0503155
sp|P08228|SODC_MOUSE - Sod1 Superoxide dismutase [Cu-Zn] [REVIEWED] ENSMUSG00000047905;ENSMUSG00000022982;IPI00130589;P08228 xxxxx	5	11	0	14	-0.09245
sp|P26040|EZRI_MOUSE - Ezr Ezrin [REVIEWED] ENSMUSG00000052397;IPI00330862;P26040;Q80ZT8;Q9DCI1 xxxxx	17	0	0	14	-0.0958804
sp|Q9JKR6|HYOU1_MOUSE - Hyou1 Hypoxia up-regulated protein 1 [REVIEWED] ENSMUSG00000032115;IPI00123342;Q9JKR6;Q3TAL1;Q3TZD0;Q3U1U2;Q64139;Q80X75 xxxxx	7	13	4	14	-0.120386
sp|Q9EP69|SAC1_MOUSE - Sacm1l Phosphatidylinositide phosphatase SAC1 [REVIEWED] ENSMUSG00000025240;IPI00109221;Q9EP69;Q80TQ1;Q99K33 xxxxx	13	8	4	14	-0.186411
sp|Q91V41|RAB14_MOUSE - Rab14 Ras-related protein Rab-14 [REVIEWED] ENSMUSG00000026878;IPI00126042;Q91V41 xxxxx	7	13	0	14	-0.268328
sp|Q8CBB9|RSAD2_MOUSE - Rsad2 Radical S-adenosyl methionine domain-containing protein 2 [REVIEWED] ENSMUSG00000020641;IPI00468281;Q8CBB9;Q3U5I6;Q3U5T4;Q3U622;Q3U627;Q3U7I6;Q3U7M1;Q3U8F4;Q3U8U7;Q3U941;Q3U977;Q3U9E1;Q3U9J0;Q3U9J3;Q3UBW6;Q3UC07;Q3UDI0;Q6PEU4;Q8VHM2;Q9JHD4 xxxxx	7	17	0	14	-0.380143
sp|Q61316|HSP74_MOUSE - Hspa4 Heat shock 70 kDa protein 4 [REVIEWED] ENSMUSG00000020361;IPI00331556;Q61316 xxxxx	12	19	12	14	-0.436852
sp|P23492|PNPH_MOUSE - Pnp Purine nucleoside phosphorylase [REVIEWED] ENSMUSG00000021871;IPI00315452;P23492;Q4FJT6 xxxxx	16	11	5	14	-0.481543
sp|Q78PY7|SND1_MOUSE - Snd1 Staphylococcal nuclease domain-containing protein 1 [REVIEWED] ENSMUSG00000001424;IPI00123129;Q78PY7;Q3TT46;Q922L5;Q9R0S1 xxxxx	16	11	0	14	-0.525924
tr|Q8CG29|Q8CG29_MOUSE - Myo1f Unconventional myosin-If [NOT_REVIEWED] ENSMUSG00000024300;IPI00336672;Q8CG29 xxxxx	11	18	5	14	-0.527046
sp|Q9WTR1|TRPV2_MOUSE - Trpv2 Transient receptor potential cation channel subfamily V member 2 [REVIEWED] ENSMUSG00000018507;IPI00322698;Q9WTR1;Q99K71 xxxxx	15	14	0	14	-0.602901
sp|P51174|ACADL_MOUSE - Acadl Long-chain specific acyl-CoA dehydrogenase, mitochondrial [REVIEWED] ENSMUSG00000026003;IPI00119114;P51174;B2KGC6;O35302;Q8QZR6;Q9CU29;Q9DB83 xxxxx	14	18	8	14	-0.70014
sp|P04104|K2C1_MOUSE - Krt1 Keratin, type II cytoskeletal 1 [REVIEWED] ENSMUSG00000046834;IPI00625729;P04104;Q149E0;Q9D2K8 xxxxx	8	10	8	13	0.366508
sp|P28650|PURA1_MOUSE - Adssl1 Adenylosuccinate synthetase isozyme 1 [REVIEWED] ENSMUSG00000011148;IPI00229690;P28650;Q8CHQ1 xxxxx	6	5	2	13	0.248069
sp|P46460|NSF_MOUSE - Nsf Vesicle-fusing ATPase [REVIEWED] ENSMUSG00000034187;IPI00656325;P46460;A2A646;Q8BQ65;Q8C3R2;Q8CCT9;Q8CEF0;Q923C6 xxxxx	0	8	0	13	0.225647
sp|P51863|VA0D1_MOUSE - Atp6v0d1 V-type proton ATPase subunit d 1 [REVIEWED] ENSMUSG00000013160;IPI00313841;P51863;Q54A57;Q9QWJ2 xxxxx	6	4	0	13	0.159223
sp|P12382|K6PL_MOUSE - Pfkl 6-phosphofructokinase, liver type [REVIEWED] ENSMUSG00000020277;IPI00554862;P12382;Q8VDX7 xxxxx	6	7	2	13	0.127
sp|P28063|PSB8_MOUSE - Psmb8 Proteasome subunit beta type-8 [REVIEWED] ENSMUSG00000024338;IPI00116712;P28063;Q3UK42;Q64300;Q792S8;Q7TMX9;Q91VH7 xxxxx	6	5	0	13	0.107833
sp|P42932|TCPQ_MOUSE - Cct8 T-complex protein 1 subunit theta [REVIEWED] ENSMUSG00000025613;IPI00469268;P42932 xxxxx	9	3	0	13	0.0493264
sp|Q80X90|FLNB_MOUSE - Flnb Filamin-B [REVIEWED] ENSMUSG00000025278;IPI00663627;Q80X90;E9QNV9;Q8VHX4;Q8VHX7;Q99KY3 xxxxx	7	14	0	13	-0.357771
sp|Q76MZ3|2AAA_MOUSE - Ppp2r1a Serine/threonine-protein phosphatase 2A 65 kDa regulatory subunit A alpha isoform [REVIEWED] ENSMUSG00000007564;IPI00310091;Q76MZ3 xxxxx	12	14	11	13	-0.447214
sp|O08749|DLDH_MOUSE - Dld Dihydrolipoyl dehydrogenase, mitochondrial [REVIEWED] ENSMUSG00000020664;IPI00874456;O08749;Q3TG55;Q3U5W5;Q3UWP7;Q99LD3 xxxxx	18	11	0	13	-0.608229
sp|Q60930|VDAC2_MOUSE - Vdac2 Voltage-dependent anion-selective channel protein 2 [REVIEWED] ENSMUSG00000021771;IPI00122547;Q60930;Q78MH6;Q99L98 xxxxx	24	19	14	13	-0.911685
sp|P05063|ALDOC_MOUSE - Aldoc Fructose-bisphosphate aldolase C [REVIEWED] ENSMUSG00000017390;IPI00119458;P05063;Q64011;Q8CA91;Q99K96;Q9DBA4;Q9JK32 xxxxx	54	40	3	13	-0.954633
sp|Q6PB66|LPPRC_MOUSE - Lrpprc Leucine-rich PPR motif-containing protein, mitochondrial [REVIEWED] ENSMUSG00000024120;IPI00420706;Q6PB66;Q8K4V0;Q9CRX4 xxxxx	0	6	7	12	0.762073
sp|P27870|VAV_MOUSE - Vav1 Proto-oncogene vav [REVIEWED] ENSMUSG00000034116;IPI00322118;P27870;Q8BTV7 xxxxx	8	10	10	12	0.707107
sp|P54987|IRG1_MOUSE - Irg1 Immune-responsive gene 1 protein [REVIEWED] ENSMUSG00000022126;IPI00111285;P54987;Q3TAA1;Q3U8E8;Q8CBA6 xxxxx	0	3	0	12	0.457496
sp|Q91VR2|ATPG_MOUSE - Atp5c1 ATP synthase subunit gamma, mitochondrial [REVIEWED] ENSMUSG00000025781;IPI00313475;Q91VR2 xxxxx	0	4	0	12	0.408248
sp|Q9D8U8|SNX5_MOUSE - Snx5 Sorting nexin-5 [REVIEWED] ENSMUSG00000027423;IPI00112053;Q9D8U8;Q543N9 xxxxx	0	4	0	12	0.408248
sp|Q9EPU0|RENT1_MOUSE - Upf1 Regulator of nonsense transcripts 1 [REVIEWED] ENSMUSG00000058301;IPI00850525;Q9EPU0;Q3UG00;Q6GYP5;Q6PHQ5;Q8K0N4;Q99PR4 xxxxx	5	0	0	12	0.35583
sp|Q3V0K9|PLSI_MOUSE - Pls1 Plastin-1 [REVIEWED] ENSMUSG00000049493;IPI00344681;Q3V0K9 xxxxx	5	0	0	12	0.35583
sp|Q61263|SOAT1_MOUSE - Soat1 Sterol O-acyltransferase 1 [REVIEWED] ENSMUSG00000026600;IPI00278153;Q61263;Q5XK32;Q64180 xxxxx	0	5	0	12	0.35583
sp|Q924Z4|CERS2_MOUSE - Cers2 Ceramide synthase 2 [REVIEWED] ENSMUSG00000015714;IPI00126253;Q924Z4;Q3TXC5;Q9DCN6 xxxxx	3	4	0	12	0.281718
sp|Q61425|HCDH_MOUSE - Hadh Hydroxyacyl-coenzyme A dehydrogenase, mitochondrial [REVIEWED] ENSMUSG00000027984;IPI00121105;Q61425;Q3TF75;Q3THK8;Q3UFI0;Q8K149;Q925U9 xxxxx	4	7	2	12	0.199117
sp|Q91VD9|NDUS1_MOUSE - Ndufs1 NADH-ubiquinone oxidoreductase 75 kDa subunit, mitochondrial [REVIEWED] ENSMUSG00000025968;IPI00308882;Q91VD9;Q3UQ73;Q8BM16 xxxxx	11	5	5	12	0.0764719
sp|Q8BSY0|ASPH_MOUSE - Asph Aspartyl/asparaginyl beta-hydroxylase [REVIEWED] ENSMUSG00000028207;IPI00624896;Q8BSY0;Q9EPA6 xxxxx	6	5	0	12	0.058621
sp|P35564|CALX_MOUSE - Canx Calnexin [REVIEWED] ENSMUSG00000020368;IPI00119618;P35564 xxxxx	4	8	0	12	0
sp|P62242|RS8_MOUSE - Rps8 40S ribosomal protein S8 [REVIEWED] ENSMUSG00000047675;ENSMUSG00000070446;IPI00466820;P62242;P09058;Q8C2G6 xxxxx	8	5	0	12	-0.057073
sp|O55143|AT2A2_MOUSE - Atp2a2 Sarcoplasmic/endoplasmic reticulum calcium ATPase 2 [REVIEWED] ENSMUSG00000029467;IPI00468900;O55143;Q9R2A9;Q9WUT5 xxxxx	4	12	2	12	-0.109764
sp|P97807|FUMH_MOUSE - Fh Fumarate hydratase, mitochondrial [REVIEWED] ENSMUSG00000026526;IPI00759940;P97807;Q3UIA9;Q99JL0;Q9DCX0 xxxxx	7	7	0	12	-0.117041
sp|Q8VDM4|PSMD2_MOUSE - Psmd2 26S proteasome non-ATPase regulatory subunit 2 [REVIEWED] ENSMUSG00000006998;IPI00123494;Q8VDM4 xxxxx	12	5	3	12	-0.123091
sp|Q8CIH5|PLCG2_MOUSE - Plcg2 1-phosphatidylinositol 4,5-bisphosphate phosphodiesterase gamma-2 [REVIEWED] ENSMUSG00000034330;IPI00229848;Q8CIH5;Q3UBA8;Q3UQT0;Q8VE69 xxxxx	10	6	0	12	-0.218218
sp|Q8CI94|PYGB_MOUSE - Pygb Glycogen phosphorylase, brain form [REVIEWED] ENSMUSG00000033059;IPI00229796;Q8CI94;Q8K283 xxxxx	8	8	0	12	-0.229416
sp|P62827|RAN_MOUSE - Ran GTP-binding nuclear protein Ran [REVIEWED] ENSMUSG00000029430;IPI00134621;P62827;P17080;P28746;P28747;Q3U954;Q811M2;Q86V08;Q9CSP3;Q9CWI7;Q9CZA2;Q9UDJ5;Q9UEU9 xxxxx	13	5	0	12	-0.282216
sp|Q9QXZ0|MACF1_MOUSE - Macf1 Microtubule-actin cross-linking factor 1 [REVIEWED] ENSMUSG00000028649;IPI01019257;Q9QXZ0;B1ARU3;P97394;P97395;P97396;Q4PLL5 xxxxx	9	11	2	12	-0.384111
sp|P97372|PSME2_MOUSE - Psme2 Proteasome activator complex subunit 2 [REVIEWED] ENSMUSG00000079197;ENSMUSG00000078153;IPI00124225;P97372;O35562 xxxxx	10	10	0	12	-0.426401
sp|P97351|RS3A_MOUSE - Rps3a 40S ribosomal protein S3a [REVIEWED] ENSMUSG00000028081;IPI00331345;P97351 xxxxx	11	11	0	12	-0.507673
sp|O35604|NPC1_MOUSE - Npc1 Niemann-Pick C1 protein [REVIEWED] ENSMUSG00000024413;IPI00132600;O35604;O35605 xxxxx	11	13	7	12	-0.548821
sp|Q91YQ5|RPN1_MOUSE - Rpn1 Dolichyl-diphosphooligosaccharide--protein glycosyltransferase subunit 1 [REVIEWED] ENSMUSG00000030062;IPI00309035;Q91YQ5;Q3U985 xxxxx	14	11	6	12	-0.593732
sp|Q9CZU6|CISY_MOUSE - Cs Citrate synthase, mitochondrial [REVIEWED] ENSMUSG00000005683;IPI00113141;Q9CZU6;Q3UDP3 xxxxx	13	12	3	12	-0.615457
sp|P38647|GRP75_MOUSE - Hspa9 Stress-70 protein, mitochondrial [REVIEWED] ENSMUSG00000024359;IPI00880839;P38647;Q7TSZ0;Q9CQ05 xxxxx	22	11	6	12	-0.646096
sp|Q9EPL9|ACOX3_MOUSE - Acox3 Peroxisomal acyl-coenzyme A oxidase 3 [REVIEWED] ENSMUSG00000029098;IPI00318108;Q9EPL9;Q7TPP6;Q80UQ0 xxxxx	14	12	4	12	-0.650945
sp|Q922Q8|LRC59_MOUSE - Lrrc59 Leucine-rich repeat-containing protein 59 [REVIEWED] ENSMUSG00000020869;IPI00123281;Q922Q8;Q3TJ35;Q3TLC7;Q3TWT9;Q3TX86 xxxxx	14	13	3	12	-0.683763
sp|P70290|EM55_MOUSE - Mpp1 55 kDa erythrocyte membrane protein [REVIEWED] ENSMUSG00000031402;IPI00137706;P70290 xxxxx	7	4	10	11	0.912871
sp|O54734|OST48_MOUSE - Ddost Dolichyl-diphosphooligosaccharide--protein glycosyltransferase 48 kDa subunit [REVIEWED] ENSMUSG00000028757;IPI00117705;O54734;Q8C4P7 xxxxx	7	10	11	11	0.762493
sp|P63323|RS12_MOUSE - Rps12 40S ribosomal protein S12 [REVIEWED] ENSMUSG00000069862;ENSMUSG00000067038;ENSMUSG00000059828;IPI00554850;P63323;P09388;P12728 xxxxx	0	4	5	11	0.762001
sp|P70398|USP9X_MOUSE - Usp9x Probable ubiquitin carboxyl-terminal hydrolase FAF-X [REVIEWED] ENSMUSG00000031010;IPI00108388;P70398;E9QLY0;Q62497 xxxxx	0	6	3	11	0.492366
sp|P11983|TCPA_MOUSE - Tcp1 T-complex protein 1 subunit alpha [REVIEWED] ENSMUSG00000068039;IPI00845611;P11983;P11984;Q3TJ96;Q3TKU1;Q3U5T8;Q3U7I8;Q3UAA8;Q3UB80;Q3UE48 xxxxx	3	0	0	11	0.444444
sp|P62281|RS11_MOUSE - Rps11 40S ribosomal protein S11 [REVIEWED] ENSMUSG00000003429;IPI00762542;P62281;P04643 xxxxx	0	5	0	11	0.331295
sp|Q62159|RHOC_MOUSE - Rhoc Rho-related GTP-binding protein RhoC [REVIEWED] ENSMUSG00000002233;IPI00122245;Q62159;Q3TUN0 xxxxx	6	0	0	11	0.271563
sp|Q9ES52|SHIP1_MOUSE - Inpp5d Phosphatidylinositol 3,4,5-trisphosphate 5-phosphatase 1 [REVIEWED] ENSMUSG00000026288;IPI00857938;Q9ES52;Q3UPF9;Q4U212;Q61034;Q61173;Q61181;Q9JKR7;Q9JLF9;Q9JLG0;Q9QVN8;Q9WUC2 xxxxx	6	8	5	11	0.218218
sp|P67778|PHB_MOUSE - Phb Prohibitin [REVIEWED] ENSMUSG00000038845;IPI00133440;P67778;P24142;Q3UB75;Q5SQG4 xxxxx	7	0	0	11	0.212
sp|Q9R112|SQRD_MOUSE - Sqrdl Sulfide:quinone oxidoreductase, mitochondrial [REVIEWED] ENSMUSG00000005803;IPI00313998;Q9R112;Q8BW20;Q91XA1;Q9D891 xxxxx	6	5	2	11	0.154303
sp|Q9QVP9|FAK2_MOUSE - Ptk2b Protein-tyrosine kinase 2-beta [REVIEWED] ENSMUSG00000059456;IPI00133132;Q9QVP9;B2RQ16;G3X8V1 xxxxx	3	6	0	11	0.123091
sp|Q80SU7|GVIN1_MOUSE - Gvin1 Interferon-induced very large GTPase 1 [REVIEWED] ENSMUSG00000078606;IPI00850922;Q80SU7;Q3U3F2;Q8BL18;Q8CBA9 xxxxx	0	10	0	11	0.0475114
sp|Q9D379|HYEP_MOUSE - Ephx1 Epoxide hydrolase 1 [REVIEWED] ENSMUSG00000038776;IPI00316509;Q9D379;P97869 xxxxx	8	3	0	11	0
sp|P47911|RL6_MOUSE - Rpl6 60S ribosomal protein L6 [REVIEWED] ENSMUSG00000029614;IPI00313222;P47911;Q6P5I2;Q925C3 xxxxx	9	11	9	11	0
sp|P45376|ALDR_MOUSE - Akr1b1 Aldose reductase [REVIEWED] ENSMUSG00000071414;ENSMUSG00000001642;IPI00223757;P45376;O70130;Q99KC9 xxxxx	3	8	0	11	0
sp|P46978|STT3A_MOUSE - Stt3a Dolichyl-diphosphooligosaccharide--protein glycosyltransferase subunit STT3A [REVIEWED] ENSMUSG00000032116;IPI00109108;P46978 xxxxx	10	2	0	11	-0.0519174
sp|P50580|PA2G4_MOUSE - Pa2g4 Proliferation-associated protein 2G4 [REVIEWED] ENSMUSG00000025364;IPI00119305;P50580 xxxxx	6	7	0	11	-0.127
sp|Q8BX70|VP13C_MOUSE - Vps13c Vacuolar protein sorting-associated protein 13C [REVIEWED] ENSMUSG00000035284;IPI00761666;Q8BX70;Q3V3W5;Q6ZPE1;Q8BLB1;Q8BQI7 xxxxx	4	14	4	11	-0.171219
sp|Q8JZQ9|EIF3B_MOUSE - Eif3b Eukaryotic translation initiation factor 3 subunit B [REVIEWED] ENSMUSG00000056076;IPI01008667;Q8JZQ9;Q922K2 xxxxx	9	6	0	11	-0.240772
sp|Q64324|STXB2_MOUSE - Stxbp2 Syntaxin-binding protein 2 [REVIEWED] ENSMUSG00000004626;IPI00133317;Q64324 xxxxx	6	9	0	11	-0.240772
sp|Q9WUA3|K6PP_MOUSE - Pfkp 6-phosphofructokinase type C [REVIEWED] ENSMUSG00000021196;IPI00661241;Q9WUA3;Q3TNA9;Q3U4P1;Q3U7G4;Q4KUG1;Q543K8;Q8C5I6;Q9JI86 xxxxx	5	13	3	11	-0.242536
Reverse_sp|A2ASS6|TITIN_MOUSE - Ttn Titin [REVIEWED] ENSMUSG00000051747;IPI00756257;A2ASS6;A2ASS5;A2ASS7 xxxxx	5	12	0	11	-0.309426
sp|P01899|HA11_MOUSE - H2-D1 H-2 class I histocompatibility antigen, D-B alpha chain [REVIEWED] ENSMUSG00000073411;IPI01026878;P01899 xxxxx	6	12	2	11	-0.310685
sp|P63101|1433Z_MOUSE - Ywhaz 14-3-3 protein zeta/delta [REVIEWED] ENSMUSG00000022285;IPI00116498;P63101;P35215;P70197;P97286;Q3TSF1;Q5EBQ1 xxxxx	6	21	8	11	-0.346844
sp|P28798|GRN_MOUSE - Grn Granulins [REVIEWED] ENSMUSG00000034708;IPI00124640;P28798 xxxxx	6	12	0	11	-0.367405
sp|Q8BP47|SYNC_MOUSE - Nars Asparagine--tRNA ligase, cytoplasmic [REVIEWED] ENSMUSG00000024587;IPI00223415;Q8BP47;Q3T9A7;Q7TPX0;Q9CRY5 xxxxx	17	6	0	11	-0.478852
sp|Q9CQI6|COTL1_MOUSE - Cotl1 Coactosin-like protein [REVIEWED] ENSMUSG00000031827;IPI00132575;Q9CQI6 xxxxx	19	8	6	11	-0.505076
sp|O09159|MA2B1_MOUSE - Man2b1 Lysosomal alpha-mannosidase [REVIEWED] ENSMUSG00000005142;IPI00381303;O09159;O55037;Q3UGH3;Q64443;Q9DBQ1 xxxxx	23	7	3	11	-0.534522
sp|Q6R5N8|TLR13_MOUSE - Tlr13 Toll-like receptor 13 [REVIEWED] ENSMUSG00000033777;IPI00342691;Q6R5N8;Q148Y7;Q3TDS2 xxxxx	10	16	4	11	-0.644831
sp|P23780|BGAL_MOUSE - Glb1 Beta-galactosidase [REVIEWED] ENSMUSG00000045594;IPI00135915;P23780 xxxxx	14	11	2	11	-0.666667
sp|Q9DCN2|NB5R3_MOUSE - Cyb5r3 NADH-cytochrome b5 reductase 3 [REVIEWED] ENSMUSG00000018042;IPI00759904;Q9DCN2 xxxxx	11	23	4	11	-0.695174
sp|Q8K183|PDXK_MOUSE - Pdxk Pyridoxal kinase [REVIEWED] ENSMUSG00000032788;IPI00283511;Q8K183;Q3TM83;Q8BJQ5 xxxxx	15	13	2	11	-0.754732
sp|Q6P5E4|UGGG1_MOUSE - Uggt1 UDP-glucose:glycoprotein glucosyltransferase 1 [REVIEWED] ENSMUSG00000037470;IPI00762897;Q6P5E4;E9QQ49;Q6NV70 xxxxx	16	13	4	11	-0.792594
sp|Q9JII6|AK1A1_MOUSE - Akr1a1 Alcohol dehydrogenase [NADP(+)] [REVIEWED] ENSMUSG00000028692;IPI00466128;Q9JII6;Q9CQI5;Q9CQT8;Q9CT53;Q9D012;Q9D016;Q9D0I7;Q9D0P3 xxxxx	12	14	9	11	-0.83205
sp|Q922R8|PDIA6_MOUSE - Pdia6 Protein disulfide-isomerase A6 [REVIEWED] ENSMUSG00000020571;IPI00222496;Q922R8;Q8BK54 xxxxx	20	16	2	11	-0.855379
sp|Q3TW96|UAP1L_MOUSE - Uap1l1 UDP-N-acetylhexosamine pyrophosphorylase-like protein 1 [REVIEWED] ENSMUSG00000026956;IPI00889248;Q3TW96;A1L3D3;Q6KAP8;Q6NVB6;Q80XP4 xxxxx	18	28	11	11	-0.86155
sp|P16045|LEG1_MOUSE - Lgals1 Galectin-1 [REVIEWED] ENSMUSG00000068220;IPI00229517;P16045;P05163;P11946;P17601;Q4FZH4;Q99M27;Q9D0X0 xxxxx	28	19	6	11	-0.89964
