# Supplementary material for: Disruption of glycolytic flux is a signal for inflammasome signaling and pyroptotic cell death
Source: eLife. 2016 Mar 24;5:e13663. doi: 10.7554/eLife.13663 (PMC4846378; doi:10.7554/eLife.13663)
Supplement: Supplementary file 2. — Data from Supplementary file 1 was normalized based on relative abundance of endogenously biotinylated proteins across conditions. This data reports normalized spectral counts. DOI: http://dx.doi.org/10.7554/eLife.13663.036 [file elife-13663-supp2.xlsx]

## Sheet: Sheet1
Supplementary File 2: Normalized MudPIT Data
	0	0	1	1
Protein	Condition 4; DMSO	Condition 2; GB111-NH2/az-GB	Condition 3; GB-IA/az-GB	Condition 1; DMSO/az-GB	Pearson
sp|P10605|CATB_MOUSE - Ctsb Cathepsin B [REVIEWED] ENSMUSG00000021939;IPI00113517;P10605;Q3UDW7 xxxxx	149.862	141.124	276.783	1348.23	0.660783
sp|O70370|CATS_MOUSE - Ctss Cathepsin S [REVIEWED] ENSMUSG00000038642;IPI00309520;O70370;E9QK18;O54973 xxxxx	40.2742	85.9862	150.389	863.35	0.659945
sp|P60710|ACTB_MOUSE - Actb Actin, cytoplasmic 1 [REVIEWED] ENSMUSG00000029580;IPI00110850;P60710;P02570;P70514;P99021;Q11211;Q3TI89;Q3TVP6;Q64316;Q6ZWM3 xxxxx	288.173	493.763	462.115	509.948	0.537204
sp|Q91ZA3|PCCA_MOUSE - Pcca Propionyl-CoA carboxylase alpha chain, mitochondrial [REVIEWED] ENSMUSG00000041650;IPI00330523;Q91ZA3;Q80VU5;Q922N3 xxxxx	304.75	304.75	304.75	304.75	#DIV/0!
sp|Q8BTM8|FLNA_MOUSE - Flna Filamin-A [REVIEWED] ENSMUSG00000031328;IPI00387373;Q8BTM8;B7FAV0;O54934;Q7TQI1;Q8BLK1;Q8BTN7;Q8VHX5;Q8VHX8;Q99KQ2 xxxxx	100.797	209.8	304.906	236.498	0.785245
sp|P52480|KPYM_MOUSE - Pkm Pyruvate kinase isozymes M1/M2 [REVIEWED] ENSMUSG00000032294;IPI00845840;P52480;Q3TBV8;Q3TBW5;Q3TC59;Q3U1X3;Q3U5P6;Q4VC20;Q64484;Q91YI8;Q9CWB1 xxxxx	175.491	168.118	158.664	273.727	0.478197
sp|Q68FD5|CLH_MOUSE - Cltc Clathrin heavy chain 1 [REVIEWED] ENSMUSG00000047126;IPI00169916;Q68FD5 xxxxx	116.013	170.982	293.614	233.391	0.901365
sp|P26039|TLN1_MOUSE - Tln1 Talin-1 [REVIEWED] ENSMUSG00000028465;IPI00465786;P26039;A2AIM8;Q8VEF0 xxxxx	45.5585	135.499	241.403	191.54	0.866013
sp|Q9JKF1|IQGA1_MOUSE - Iqgap1 Ras GTPase-activating-like protein IQGAP1 [REVIEWED] ENSMUSG00000030536;IPI00467447;Q9JKF1;G3UW45 xxxxx	93.2308	169.431	229.69	210.649	0.847939
sp|P16675|PPGB_MOUSE - Ctsa Lysosomal protective protein [REVIEWED] ENSMUSG00000017760;IPI00137177;P16675;Q8VEF6 xxxxx	25.797	71.4494	68.7804	193.973	0.659882
sp|Q61233|PLSL_MOUSE - Lcp1 Plastin-2 [REVIEWED] ENSMUSG00000021998;IPI00118892;Q61233;Q3UE24;Q8R1X3;Q9CV77 xxxxx	68.434	164.871	201.422	193.273	0.76267
sp|P16858|G3P_MOUSE - Gapdh Glyceraldehyde-3-phosphate dehydrogenase [REVIEWED] ENSMUSG00000096438;ENSMUSG00000078965;ENSMUSG00000057666;IPI00273646;P16858;A6H6A8;Q0QEU0;Q3THM2;Q3TUI2;Q3UMT2;Q4V783;Q569X2;Q569X5;Q5U410 xxxxx	95.2289	144.948	242.723	184.1	0.864123
sp|P68134|ACTS_MOUSE - Acta1 Actin, alpha skeletal muscle [REVIEWED] ENSMUSG00000031972;IPI00110827;P68134;P02568;P99020 xxxxx	81.3032	179.486	208.011	185.2	0.680596
sp|Q9JHU4|DYHC1_MOUSE - Dync1h1 Cytoplasmic dynein 1 heavy chain 1 [REVIEWED] ENSMUSG00000018707;IPI00119876;Q9JHU4;E9QM71 xxxxx	34.4322	106.068	89.2536	146.246	0.591615
sp|P20029|GRP78_MOUSE - Hspa5 78 kDa glucose-regulated protein [REVIEWED] ENSMUSG00000026864;IPI00319992;P20029;O35642;Q3UFF2;Q61630 xxxxx	119.607	118.622	50.9779	171.793	-0.0901008
sp|P10126|EF1A1_MOUSE - Eef1a1 Elongation factor 1-alpha 1 [REVIEWED] ENSMUSG00000037742;IPI00307837;P10126;Q61511;Q6ZWN2;Q8BMB8;Q8BVS8;Q99KU5 xxxxx	35.9002	96.071	144.503	115.525	0.804785
sp|Q8VDD5|MYH9_MOUSE - Myh9 Myosin-9 [REVIEWED] ENSMUSG00000022443;IPI00123181;Q8VDD5;Q3UHT9;Q3UHU4;Q6KAN6;Q811I2 xxxxx	83.906	170.809	135.093	119.192	-0.00343665
sp|Q8BFZ3|ACTBL_MOUSE - Actbl2 Beta-actin-like protein 2 [REVIEWED] ENSMUSG00000055194;IPI00221528;Q8BFZ3 xxxxx	61.5423	129.377	78.8253	114.256	0.0199689
sp|P99024|TBB5_MOUSE - Tubb5 Tubulin beta-5 chain [REVIEWED] ENSMUSG00000001525;IPI00117352;P99024;B1B178;P05218;Q3TFB6;Q3THH9;Q3TIL1;Q3UAV4;Q3UF52;Q8WUC1;Q9CY33 xxxxx	14.7102	131.613	86.7482	100.928	0.240991
sp|Q69ZN7|MYOF_MOUSE - Myof Myoferlin [REVIEWED] ENSMUSG00000048612;IPI00989268;Q69ZN7;Q7TMG0;Q80V33;Q8BU64;Q8BU70;Q8BUC1;Q8BVY6;Q8C0D1;Q8R3B4 xxxxx	40.5447	69.9604	54.3884	106.107	0.510763
sp|P68369|TBA1A_MOUSE - Tuba1a Tubulin alpha-1A chain [REVIEWED] ENSMUSG00000072235;IPI00110753;P68369;P02551;P05210;P05212;Q3TGF0;Q3TIW2;Q3TPJ1;Q3ULN1;Q5XJF8 xxxxx	8.36361	39.0177	32.0115	93.6071	0.626632
sp|P58252|EF2_MOUSE - Eef2 Elongation factor 2 [REVIEWED] ENSMUSG00000034994;IPI00466069;P58252;Q544E4 xxxxx	68.7626	115.787	51.9877	107.463	-0.237083
sp|P49935|CATH_MOUSE - Ctsh Pro-cathepsin H [REVIEWED] ENSMUSG00000032359;IPI00118987;P49935;Q3UCD6 xxxxx	3.42347	16.8423	61.1486	69.5857	0.980026
sp|Q91ZX7|LRP1_MOUSE - Lrp1 Prolow-density lipoprotein receptor-related protein 1 [REVIEWED] ENSMUSG00000040249;IPI00119063;Q91ZX7;Q61291;Q920Y4 xxxxx	54.2938	80.4513	106.307	88.9476	0.806253
sp|P68368|TBA4A_MOUSE - Tuba4a Tubulin alpha-4A chain [REVIEWED] ENSMUSG00000026202;IPI00117350;P68368;P05215;Q3TY31 xxxxx	11.7949	48.0222	37.2103	84.9726	0.592569
sp|Q61093|CY24B_MOUSE - Cybb Cytochrome b-245 heavy chain [REVIEWED] ENSMUSG00000015340;IPI00117117;Q61093 xxxxx	52.0072	38.4275	58.9797	91.5856	0.769213
sp|P12265|BGLR_MOUSE - Gusb Beta-glucuronidase [REVIEWED] ENSMUSG00000025534;IPI00309230;P12265;Q61601;Q64473;Q64474;Q6IR10 xxxxx	33.1182	40.4515	54.0839	86.3464	0.819304
sp|P68372|TBB4B_MOUSE - Tubb4b Tubulin beta-4B chain [REVIEWED] ENSMUSG00000036752;IPI00169463;P68372;P05217;Q3TKF0;Q3UJ73;Q99JZ6 xxxxx	13.5644	108.244	75.3149	84.8769	0.274276
sp|Q8R016|BLMH_MOUSE - Blmh Bleomycin hydrolase [REVIEWED] ENSMUSG00000020840;IPI00153107;Q8R016;Q3TJR8;Q8BLZ4;Q8BZH9;Q8C111;Q8CID9 xxxxx	3.40363	117.02	44.0035	87.5727	0.0646705
sp|Q9WV32|ARC1B_MOUSE - Arpc1b Actin-related protein 2/3 complex subunit 1B [REVIEWED] ENSMUSG00000029622;IPI00125143;Q9WV32;Q9CRC4 xxxxx	58.7945	101.31	24.2734	100.622	-0.273989
sp|P16110|LEG3_MOUSE - Lgals3 Galectin-3 [REVIEWED] ENSMUSG00000050335;IPI00131259;P16110 xxxxx	54.0152	86.8521	76.7043	89.4284	0.45242
sp|P17182|ENOA_MOUSE - Eno1 Alpha-enolase [REVIEWED] ENSMUSG00000059040;ENSMUSG00000063524;IPI00462072;P17182;Q99KT7;Q9DCY7 xxxxx	30.1779	24.9574	103.955	68.9101	0.920127
sp|P62814|VATB2_MOUSE - Atp6v1b2 V-type proton ATPase subunit B, brain isoform [REVIEWED] ENSMUSG00000006273;IPI00119113;P62814;O09045;P50517;Q3TG74;Q3TL62;Q3TVK6;Q3TWR0;Q3U791;Q3U7C8;Q3U9Z0;Q3UAW7 xxxxx	30.0043	42.1489	70.9192	76.9276	0.969419
sp|O88342|WDR1_MOUSE - Wdr1 WD repeat-containing protein 1 [REVIEWED] ENSMUSG00000005103;IPI00314748;O88342 xxxxx	35.3139	55.3628	27.3434	88.9799	0.269445
sp|Q8VDN2|AT1A1_MOUSE - Atp1a1 Sodium/potassium-transporting ATPase subunit alpha-1 [REVIEWED] ENSMUSG00000033161;IPI00311682;Q8VDN2;Q91Z09 xxxxx	35.1059	37.2863	91.3955	71.2123	0.952912
sp|P47738|ALDH2_MOUSE - Aldh2 Aldehyde dehydrogenase, mitochondrial [REVIEWED] ENSMUSG00000029455;IPI00111218;P47738 xxxxx	51.0685	64.597	161.937	69.397	0.658307
sp|P63017|HSP7C_MOUSE - Hspa8 Heat shock cognate 71 kDa protein [REVIEWED] ENSMUSG00000015656;IPI00323357;P63017;P08109;P12225;Q3U6R0;Q3U764;Q3U7D7;Q3U7E2;Q3U9B4;Q3U9G0;Q3UGM0;Q5FWJ6;Q62373;Q62374;Q62375;Q6NZD0 xxxxx	45.5044	51.3296	50.6668	81.4992	0.622887
sp|Q61598|GDIB_MOUSE - Gdi2 Rab GDP dissociation inhibitor beta [REVIEWED] ENSMUSG00000021218;IPI00416577;Q61598;Q541Z9;Q8C530;Q9D8M9 xxxxx	56.5766	56.5322	43.1505	85.7406	0.25347
sp|Q04447|KCRB_MOUSE - Ckb Creatine kinase B-type [REVIEWED] ENSMUSG00000001270;IPI00136703;Q04447;Q3KQP4;Q3TKI3;Q3U5P5;Q3UF71;Q9CXK6 xxxxx	61.9633	61.3652	104.836	75.8353	0.813311
sp|Q99MR8|MCCA_MOUSE - Mccc1 Methylcrotonoyl-CoA carboxylase subunit alpha, mitochondrial [REVIEWED] ENSMUSG00000027709;IPI00320850;Q99MR8;Q3TGU0;Q9D8R2 xxxxx	103.477	165.215	232.691	70.6169	0.139748
sp|Q99P91|GPNMB_MOUSE - Gpnmb Transmembrane glycoprotein NMB [REVIEWED] ENSMUSG00000029816;IPI00311808;Q99P91;Q3U3R9;Q8BVV9;Q8BXL4;Q9QXA0 xxxxx	120.44	109.297	26.6591	89.6041	-0.782136
sp|Q02053|UBA1_MOUSE - Uba1 Ubiquitin-like modifier-activating enzyme 1 [REVIEWED] ENSMUSG00000001924;IPI00123313;Q02053;A6H6S6;P31253;Q542H8 xxxxx	29.7522	33.3895	37.3746	69.4837	0.691257
sp|P50516|VATA_MOUSE - Atp6v1a V-type proton ATPase catalytic subunit A [REVIEWED] ENSMUSG00000052459;IPI00844689;P50516;Q3TKS0;Q3U5W3;Q3U777;Q3UDZ9;Q3US31;Q8CHX2 xxxxx	22.7919	47.1342	53.172	65.9019	0.784515
tr|Q9Z1R9|Q9Z1R9_MOUSE - Prss1 Protease, serine, 1 (Trypsin 1) [NOT_REVIEWED] ENSMUSG00000062751;IPI00130391;Q9Z1R9 xxxxx	48.1569	86.2334	16.384	81.2258	-0.326872
sp|P05064|ALDOA_MOUSE - Aldoa Fructose-bisphosphate aldolase A [REVIEWED] ENSMUSG00000030695;IPI00221402;P05064 xxxxx	66.2886	77.493	37.5135	79.7049	-0.395238
sp|Q9DCD0|6PGD_MOUSE - Pgd 6-phosphogluconate dehydrogenase, decarboxylating [REVIEWED] ENSMUSG00000028961;IPI00466919;Q9DCD0;Q3UD80 xxxxx	21.2637	31.3672	98.1353	54.2339	0.842745
sp|P14211|CALR_MOUSE - Calr Calreticulin [REVIEWED] ENSMUSG00000003814;IPI00123639;P14211;Q3TVD2 xxxxx	29.169	54.7472	20.27	72.8138	0.110252
sp|Q7TMM9|TBB2A_MOUSE - Tubb2a Tubulin beta-2A chain [REVIEWED] ENSMUSG00000058672;IPI00338039;Q7TMM9 xxxxx	12.1454	91.0492	40.1405	66.6648	0.0306566
sp|Q9WUM4|COR1C_MOUSE - Coro1c Coronin-1C [REVIEWED] ENSMUSG00000004530;IPI00124820;Q9WUM4;Q8VCQ5 xxxxx	39.8473	36.0523	34.5084	69.5919	0.491971
sp|P26041|MOES_MOUSE - Msn Moesin [REVIEWED] ENSMUSG00000031207;IPI00110588;P26041;B1AX70;Q3UL28;Q8BSN4 xxxxx	53.6201	56.599	108.35	62.4305	0.681254
sp|Q01853|TERA_MOUSE - Vcp Transitional endoplasmic reticulum ATPase [REVIEWED] ENSMUSG00000028452;IPI00622235;Q01853;Q3TFH9;Q3TIM2;Q3TXN9;Q6PI18;Q8BSR6;Q8CEG4 xxxxx	28.2327	26.2952	42.9415	61.5307	0.883859
sp|P13020|GELS_MOUSE - Gsn Gelsolin [REVIEWED] ENSMUSG00000026879;IPI00759948;P13020;Q3UPB1;Q8R590 xxxxx	19.8614	43.4272	42.796	57.9154	0.686877
sp|P18760|COF1_MOUSE - Cfl1 Cofilin-1 [REVIEWED] ENSMUSG00000056201;IPI00407543;P18760 xxxxx	91.8384	98.1995	36.9263	73.0359	-0.839382
sp|Q8BMS1|ECHA_MOUSE - Hadha Trifunctional enzyme subunit alpha, mitochondrial [REVIEWED] ENSMUSG00000025745;IPI00223092;Q8BMS1;Q3TCY3;Q5U5Y5;Q8QZU4 xxxxx	22.9456	31.8999	36.5575	57.5971	0.772268
sp|P10107|ANXA1_MOUSE - Anxa1 Annexin A1 [REVIEWED] ENSMUSG00000024659;IPI00230395;P10107 xxxxx	25.4302	39.881	41.529	58.1598	0.740952
sp|Q7TMB8|CYFP1_MOUSE - Cyfip1 Cytoplasmic FMR1-interacting protein 1 [REVIEWED] ENSMUSG00000030447;IPI00831544;Q7TMB8;O88558;Q3U7Q7;Q5DU50;Q7TSZ5;Q80VN6;Q8CE85;Q99LY1 xxxxx	11.2011	22.1112	35.3368	51.3509	0.889602
sp|P08113|ENPL_MOUSE - Hsp90b1 Endoplasmin [REVIEWED] ENSMUSG00000020048;IPI00129526;P08113;P11427 xxxxx	14.5128	36.3145	94.4308	45.7419	0.764042
sp|P40142|TKT_MOUSE - Tkt Transketolase [REVIEWED] ENSMUSG00000021957;IPI00137409;P40142;Q3U7Y1;Q3UK62;Q545A1;Q9ESA0 xxxxx	33.3738	40.6075	46.9839	58.0349	0.856805
sp|P27659|RL3_MOUSE - Rpl3 60S ribosomal protein L3 [REVIEWED] ENSMUSG00000057111;ENSMUSG00000060036;IPI00321170;P27659;O89071;Q91VJ6 xxxxx	9.40548	30.3159	7.19985	58.0788	0.312116
sp|P06745|G6PI_MOUSE - Gpi Glucose-6-phosphate isomerase [REVIEWED] ENSMUSG00000036427;IPI00228633;P06745;O89062;Q3TEE7;Q3TW50;Q3UUX1;Q3UY84;Q3UZJ1;Q5RJI3;Q8C675;Q9JM07 xxxxx	24.4327	30.8979	40.8069	54.8626	0.879023
sp|P27773|PDIA3_MOUSE - Pdia3 Protein disulfide-isomerase A3 [REVIEWED] ENSMUSG00000027248;IPI00230108;P27773;Q3TEI9;Q3TIL2;Q3UZK8;Q8C2F4;Q99LF6 xxxxx	53.2258	54.9971	59.2641	58.513	0.96176
sp|P06797|CATL1_MOUSE - Ctsl1 Cathepsin L1 [REVIEWED] ENSMUSG00000021477;IPI00128154;P06797;Q91UZ0 xxxxx	3.49992	2.03567	6.12383	47.3406	0.634883
sp|P36423|THAS_MOUSE - Tbxas1 Thromboxane-A synthase [REVIEWED] ENSMUSG00000029925;IPI00322543;P36423;P97505 xxxxx	0	33.6862	48.792	43.5218	0.772334
sp|E9Q555|RN213_MOUSE - Rnf213 E3 ubiquitin-protein ligase RNF213 [REVIEWED] ENSMUSG00000070327;IPI00889205;E9Q555;Q8BVK6 xxxxx	7.86781	53.3887	27.5327	53.2108	0.254938
sp|P97821|CATC_MOUSE - Ctsc Dipeptidyl peptidase 1 [REVIEWED] ENSMUSG00000030560;IPI00130015;P97821;O08853 xxxxx	1.91048	0	5.84987	44.2396	0.663289
sp|Q8C3J5|DOCK2_MOUSE - Dock2 Dedicator of cytokinesis protein 2 [REVIEWED] ENSMUSG00000020143;IPI00117274;Q8C3J5;Q5SRI4;Q99M79 xxxxx	12.3848	29.962	30.7774	49.8758	0.722017
sp|Q61830|MRC1_MOUSE - Mrc1 Macrophage mannose receptor 1 [REVIEWED] ENSMUSG00000026712;IPI00126186;Q61830;Q8C502 xxxxx	19.4481	20.1427	48.0578	46.3514	0.998872
sp|Q922F4|TBB6_MOUSE - Tubb6 Tubulin beta-6 chain [REVIEWED] ENSMUSG00000001473;IPI00122928;Q922F4 xxxxx	0	65.0478	35.1786	48.7736	0.197206
sp|P09411|PGK1_MOUSE - Pgk1 Phosphoglycerate kinase 1 [REVIEWED] ENSMUSG00000069008;ENSMUSG00000062070;ENSMUSG00000066632;IPI00555069;P09411;Q3TPE6;Q3UKV8;Q5XJE7 xxxxx	37.8774	52.0997	108.666	46.3571	0.584123
sp|Q3U7R1|ESYT1_MOUSE - Esyt1 Extended synaptotagmin-1 [REVIEWED] ENSMUSG00000025366;IPI00756325;Q3U7R1;Q8C8R1;Q91X62;Q9CVH0;Q9Z1X5;Q9Z1X6 xxxxx	14.2748	24.3955	34.5357	46.794	0.884673
sp|P11499|HS90B_MOUSE - Hsp90ab1 Heat shock protein HSP 90-beta [REVIEWED] ENSMUSG00000023944;IPI00554929;P11499;O89078;Q3UIQ7 xxxxx	12.7988	50.599	36.3499	49.2522	0.365844
sp|P48036|ANXA5_MOUSE - Anxa5 Annexin A5 [REVIEWED] ENSMUSG00000027712;IPI00317309;P48036;Q3U5Q1;Q3U5X4;Q3U8K1;Q3UGV0;Q99LA1 xxxxx	47.659	74.5723	96.1427	49.6261	0.295836
sp|Q9JJZ2|TBA8_MOUSE - Tuba8 Tubulin alpha-8 chain [REVIEWED] ENSMUSG00000030137;IPI00311175;Q9JJZ2;D4P911;Q9CV57 xxxxx	0	27.1948	22.4975	43.3077	0.623397
sp|P17742|PPIA_MOUSE - Ppia Peptidyl-prolyl cis-trans isomerase A [REVIEWED] ENSMUSG00000059583;ENSMUSG00000062933;ENSMUSG00000071866;IPI00554989;P17742;Q9CWJ5;Q9R137 xxxxx	22.454	59.2537	20.3715	53.9208	-0.104717
sp|Q60597|ODO1_MOUSE - Ogdh 2-oxoglutarate dehydrogenase, mitochondrial [REVIEWED] ENSMUSG00000020456;IPI00845652;Q60597;Q3UDM7;Q5DTI4;Q5SVX7;Q5SVX9;Q6PFZ2;Q80Y57;Q8K0K7;Q8K2Z3;Q8R3M2;Q91WP2 xxxxx	23.1687	31.4432	24.2537	50.1344	0.45761
sp|P97449|AMPN_MOUSE - Anpep Aminopeptidase N [REVIEWED] ENSMUSG00000039062;IPI00319509;P97449;Q91YH8;Q99K63 xxxxx	32.5052	39.9525	30.0469	50.4955	0.254069
sp|P35700|PRDX1_MOUSE - Prdx1 Peroxiredoxin-1 [REVIEWED] ENSMUSG00000028691;IPI00121788;P35700;Q3UBV4;Q9CWI2 xxxxx	30.7295	68.0439	85.8395	44.3871	0.370405
sp|P62880|GBB2_MOUSE - Gnb2 Guanine nucleotide-binding protein G(I)/G(S)/G(T) subunit beta-2 [REVIEWED] ENSMUSG00000029713;IPI00162780;P62880;P11016;P54312 xxxxx	24.629	30.3158	35.0762	45.979	0.832294
sp|Q9ERD7|TBB3_MOUSE - Tubb3 Tubulin beta-3 chain [REVIEWED] ENSMUSG00000062380;IPI00112251;Q9ERD7;Q3UF42;Q5I036 xxxxx	6.04147	0	0	42.9585	0.515592
sp|P20060|HEXB_MOUSE - Hexb Beta-hexosaminidase subunit beta [REVIEWED] ENSMUSG00000021665;IPI00115530;P20060 xxxxx	8.30374	14.5839	31.907	38.2053	0.96631
sp|P40124|CAP1_MOUSE - Cap1 Adenylyl cyclase-associated protein 1 [REVIEWED] ENSMUSG00000028656;IPI00137331;P40124;Q8BPT7 xxxxx	17.2141	26.519	77.8768	36.39	0.761006
sp|P19096|FAS_MOUSE - Fasn Fatty acid synthase [REVIEWED] ENSMUSG00000025153;IPI00113223;P19096;B1ATU8;Q6PB72;Q8C4Z0;Q9EQR0 xxxxx	10.7526	23.8093	16.1733	44.2648	0.508571
sp|Q8BLF1|NCEH1_MOUSE - Nceh1 Neutral cholesterol ester hydrolase 1 [REVIEWED] ENSMUSG00000027698;IPI00403586;Q8BLF1;Q69ZL0;Q8BZK3 xxxxx	13.3202	28.2008	34.8043	41.6746	0.833437
sp|P63038|CH60_MOUSE - Hspd1 60 kDa heat shock protein, mitochondrial [REVIEWED] ENSMUSG00000025980;IPI00845678;P63038;P19226;P19227;P97602;Q3KQP2;Q3UIP0;Q8C2C7;Q8VEF4 xxxxx	3.15641	9.63833	53.1569	30.0484	0.9008
sp|P06800|PTPRC_MOUSE - Ptprc Receptor-type tyrosine-protein phosphatase C [REVIEWED] ENSMUSG00000026395;IPI00461132;P06800;E9QLT5;Q61812;Q61813;Q61814;Q61815;Q78EF1 xxxxx	10.6443	15.9665	13.7232	42.666	0.581907
sp|Q8R1F1|NIBL1_MOUSE - Fam129b Niban-like protein 1 [REVIEWED] ENSMUSG00000026796;IPI00330695;Q8R1F1;Q3TCV6;Q3U8I3;Q3UC84;Q3UDW4;Q3UIE4;Q543S7;Q8BQ71;Q8CC78 xxxxx	18.8826	23.0638	7.7091	45.3445	0.203088
sp|Q99KI0|ACON_MOUSE - Aco2 Aconitate hydratase, mitochondrial [REVIEWED] ENSMUSG00000022477;IPI00116074;Q99KI0;Q3UDK9;Q3ULG9;Q3UNH7;Q505P4 xxxxx	26.036	28.4063	68.7797	36.778	0.747807
sp|Q99JY9|ARP3_MOUSE - Actr3 Actin-related protein 3 [REVIEWED] ENSMUSG00000026341;IPI00115627;Q99JY9;Q9DC56 xxxxx	34.6784	55.6919	58.9915	41.6382	0.257237
sp|Q5SWU9|ACACA_MOUSE - Acaca Acetyl-CoA carboxylase 1 [REVIEWED] ENSMUSG00000020532;IPI00848443;Q5SWU9;A2A6H4;Q5SWU6;Q5SWU7;Q5SWU8;Q6JIZ1;Q6PHL9;Q705X8;Q705X9;Q91VC8;Q925C4;Q925C5 xxxxx	48.1052	57.848	57.1787	43.8681	-0.205821
sp|Q60854|SPB6_MOUSE - Serpinb6 Serpin B6 [REVIEWED] ENSMUSG00000060147;IPI00121471;Q60854 xxxxx	6.44621	9.37332	31.9571	32.2234	0.996327
sp|Q91VI7|RINI_MOUSE - Rnh1 Ribonuclease inhibitor [REVIEWED] ENSMUSG00000038650;IPI00313296;Q91VI7;Q924P4 xxxxx	20.1986	23.708	37.8888	38.2045	0.988227
sp|Q7TPR4|ACTN1_MOUSE - Actn1 Alpha-actinin-1 [REVIEWED] ENSMUSG00000015143;IPI00380436;Q7TPR4 xxxxx	22.5345	25.7537	24.2106	41.5011	0.573742
sp|P62874|GBB1_MOUSE - Gnb1 Guanine nucleotide-binding protein G(I)/G(S)/G(T) subunit beta-1 [REVIEWED] ENSMUSG00000029064;IPI00120716;P62874;P04697;P04901 xxxxx	18.1761	20.93	31.4815	37.4124	0.955035
sp|P07356|ANXA2_MOUSE - Anxa2 Annexin A2 [REVIEWED] ENSMUSG00000032231;IPI00468203;P07356 xxxxx	23.9008	22.9431	28.5595	39.5966	0.805712
sp|P26443|DHE3_MOUSE - Glud1 Glutamate dehydrogenase 1, mitochondrial [REVIEWED] ENSMUSG00000021794;IPI00114209;P26443;Q8C273 xxxxx	22.9364	40.9579	27.1067	40.9989	0.129759
sp|P14824|ANXA6_MOUSE - Anxa6 Annexin A6 [REVIEWED] ENSMUSG00000018340;IPI00554894;P14824;Q8BSS4 xxxxx	16.1975	12.6821	5.08681	41.0336	0.319807
sp|P51881|ADT2_MOUSE - Slc25a5 ADP/ATP translocase 2 [REVIEWED] ENSMUSG00000016319;IPI00127841;P51881;Q61311 xxxxx	11.2543	24.5708	47.9451	32.2298	0.835821
sp|P05202|AATM_MOUSE - Got2 Aspartate aminotransferase, mitochondrial [REVIEWED] ENSMUSG00000031672;IPI00117312;P05202;O09188;Q3TIP6;Q3UD91;Q5HZH5 xxxxx	10.1975	22.2969	16.1905	37.3152	0.520943
sp|P18242|CATD_MOUSE - Ctsd Cathepsin D [REVIEWED] ENSMUSG00000007891;IPI00111013;P18242 xxxxx	53.8255	31.9064	50.5174	40.7507	0.161003
sp|P09103|PDIA1_MOUSE - P4hb Protein disulfide-isomerase [REVIEWED] ENSMUSG00000025130;IPI00133522;P09103;Q922C8 xxxxx	21.8204	41.8072	13.1007	42.2717	-0.162871
sp|Q8K2B3|DHSA_MOUSE - Sdha Succinate dehydrogenase [ubiquinone] flavoprotein subunit, mitochondrial [REVIEWED] ENSMUSG00000021577;IPI00230351;Q8K2B3;Q0QF19;Q3UH25;Q3UKP7;Q3V4B1;Q921P5;Q9Z1Z4 xxxxx	19.4101	24.9183	47.1183	34.5534	0.887378
sp|Q99JI6|RAP1B_MOUSE - Rap1b Ras-related protein Rap-1b [REVIEWED] ENSMUSG00000052681;IPI00407954;Q99JI6 xxxxx	11.649	19.5734	20.3823	35.3953	0.71503
sp|P61161|ARP2_MOUSE - Actr2 Actin-related protein 2 [REVIEWED] ENSMUSG00000020152;IPI00177038;P61161;O15142;Q6PI31 xxxxx	14.0334	16.5611	7.47304	38.9325	0.333907
sp|P37040|NCPR_MOUSE - Por NADPH--cytochrome P450 reductase [REVIEWED] ENSMUSG00000005514;IPI00621548;P37040 xxxxx	23.2429	22.6294	61.8865	32.2412	0.754817
sp|Q3TRM8|HXK3_MOUSE - Hk3 Hexokinase-3 [REVIEWED] ENSMUSG00000025877;IPI00751595;Q3TRM8;Q3TAX6;Q3UDP1;Q3UEA4 xxxxx	19.4434	28.7157	30.3513	36.4896	0.765031
sp|P29416|HEXA_MOUSE - Hexa Beta-hexosaminidase subunit alpha [REVIEWED] ENSMUSG00000025232;IPI00125522;P29416;Q64246;Q91XG3 xxxxx	31.9446	31.362	8.32458	43.3688	-0.228118
sp|Q9D1A2|CNDP2_MOUSE - Cndp2 Cytosolic non-specific dipeptidase [REVIEWED] ENSMUSG00000024644;IPI00315879;Q9D1A2;Q3TA80;Q3TI32;Q3U7B9;Q99PV1 xxxxx	41.9256	34.9523	48.905	38.2172	0.493646
sp|Q8BHN3|GANAB_MOUSE - Ganab Neutral alpha-glucosidase AB [REVIEWED] ENSMUSG00000071650;IPI00421253;Q8BHN3;O08794;Q149A6;Q80U81;Q9CS53 xxxxx	10.0844	9.88428	11.4364	34.595	0.622664
sp|Q9D8E6|RL4_MOUSE - Rpl4 60S ribosomal protein L4 [REVIEWED] ENSMUSG00000032399;IPI00111412;Q9D8E6;Q9CY08 xxxxx	11.7188	12.8747	15.9478	34.4587	0.701429
sp|P24270|CATA_MOUSE - Cat Catalase [REVIEWED] ENSMUSG00000027187;IPI00312058;P24270;Q3TXQ6 xxxxx	10.68	17.5457	16.0642	34.7101	0.625852
sp|Q8CIE6|COPA_MOUSE - Copa Coatomer subunit alpha [REVIEWED] ENSMUSG00000026553;IPI00229834;Q8CIE6;E9Q075 xxxxx	18.0087	26.9687	12.6764	38.3461	0.155311
sp|Q9WV54|ASAH1_MOUSE - Asah1 Acid ceramidase [REVIEWED] ENSMUSG00000031591;IPI00125266;Q9WV54 xxxxx	20.4345	35.436	37.0786	35.0509	0.604815
sp|P62908|RS3_MOUSE - Rps3 40S ribosomal protein S3 [REVIEWED] ENSMUSG00000030744;IPI00134599;P62908;P17073;P47933 xxxxx	8.54045	8.49978	6.97352	33.9862	0.530691
tr|E9Q616|E9Q616_MOUSE - Ahnak Protein Ahnak [NOT_REVIEWED] ENSMUSG00000069833;IPI00553798;E9Q616 xxxxx	0	42.0287	0	36.9713	-0.0637577
sp|Q9CVB6|ARPC2_MOUSE - Arpc2 Actin-related protein 2/3 complex subunit 2 [REVIEWED] ENSMUSG00000006304;IPI00661414;Q9CVB6;Q3U870 xxxxx	9.65542	22.9316	7.39119	36.0218	0.235728
sp|Q03265|ATPA_MOUSE - Atp5a1 ATP synthase subunit alpha, mitochondrial [REVIEWED] ENSMUSG00000025428;IPI00130280;Q03265;Q3TFN0;Q3THN8;Q3TPR0;Q3TPV3;Q3TZU3;Q3UIR7;Q543Y6 xxxxx	23.423	35.1346	22.6487	36.7937	0.03405
sp|Q61549|EMR1_MOUSE - Emr1 EGF-like module-containing mucin-like hormone receptor-like 1 [REVIEWED] ENSMUSG00000004730;IPI00122411;Q61549 xxxxx	0	3.47612	0	29.5239	0.526677
sp|Q9WUU7|CATZ_MOUSE - Ctsz Cathepsin Z [REVIEWED] ENSMUSG00000016256;IPI00986833;Q9WUU7 xxxxx	12.6488	18.8011	9.83628	34.7139	0.33994
sp|Q8VEK3|HNRPU_MOUSE - Hnrnpu Heterogeneous nuclear ribonucleoprotein U [REVIEWED] ENSMUSG00000039630;IPI00458583;Q8VEK3 xxxxx	12.3801	23.2022	14.4411	33.9766	0.376491
sp|P15864|H12_MOUSE - Hist1h1c Histone H1.2 [REVIEWED] ENSMUSG00000036181;IPI00223713;P15864 xxxxx	0	0	0	27	0.57735
tr|O88325|O88325_MOUSE - Naglu Alpha-N-acetylglucosaminidase (Sanfilippo disease IIIB), isoform CRA_b [NOT_REVIEWED] ENSMUSG00000001751;IPI00314726;O88325 xxxxx	17.3374	13.793	14.6446	33.225	0.530459
sp|Q00519|XDH_MOUSE - Xdh Xanthine dehydrogenase/oxidase [REVIEWED] ENSMUSG00000024066;IPI00352984;Q00519;E9QLM9 xxxxx	14.7602	26.1952	25.4948	31.5498	0.660311
sp|Q9Z1Q5|CLIC1_MOUSE - Clic1 Chloride intracellular channel protein 1 [REVIEWED] ENSMUSG00000007041;IPI00130344;Q9Z1Q5 xxxxx	11.3628	6.85377	0	33.7834	0.307328
tr|G3X922|G3X922_MOUSE - Dnajc13 Protein Dnajc13 [NOT_REVIEWED] ENSMUSG00000032560;;G3X922 xxxxx	9.42664	15.0509	15.847	29.6754	0.70598
sp|Q62465|VAT1_MOUSE - Vat1 Synaptic vesicle membrane protein VAT-1 homolog [REVIEWED] ENSMUSG00000034993;IPI00126072;Q62465;Q8R3G0;Q8R3T8 xxxxx	8.26003	23.0795	41.6576	26.0029	0.765954
sp|Q9DBJ1|PGAM1_MOUSE - Pgam1 Phosphoglycerate mutase 1 [REVIEWED] ENSMUSG00000069106;ENSMUSG00000066695;ENSMUSG00000011752;IPI00457898;Q9DBJ1;Q9D6W0;Q9ERT3 xxxxx	9.09568	17.427	21.8438	28.6335	0.844369
tr|A6ZI46|A6ZI46_MOUSE - Aldoart1 Fructose-bisphosphate aldolase [NOT_REVIEWED] ENSMUSG00000059343;IPI00856272;A6ZI46 xxxxx	18.2234	14.6559	0	36.1207	0.0630203
sp|P62962|PROF1_MOUSE - Pfn1 Profilin-1 [REVIEWED] ENSMUSG00000018293;IPI00224740;P62962;P10924 xxxxx	15.4233	35.9762	72.8066	25.7939	0.545278
sp|Q62192|CD180_MOUSE - Cd180 CD180 antigen [REVIEWED] ENSMUSG00000021624;IPI00343568;Q62192;Q8C251 xxxxx	14.7402	20.7739	23.1457	30.3402	0.804272
sp|Q60710|SAMH1_MOUSE - Samhd1 SAM domain and HD domain-containing protein 1 [REVIEWED] ENSMUSG00000027639;IPI00120095;Q60710;Q3U5X2;Q543A4;Q91VK8 xxxxx	19.0374	25.8365	59.315	26.8111	0.659953
sp|Q9JMH6|TRXR1_MOUSE - Txnrd1 Thioredoxin reductase 1, cytoplasmic [REVIEWED] ENSMUSG00000020250;IPI00776252;Q9JMH6;Q3UEB7;Q3UK84;Q8CI31;Q99P49;Q9CSV5 xxxxx	7.23068	11.2149	18.9773	26.5771	0.912725
sp|P51150|RAB7A_MOUSE - Rab7a Ras-related protein Rab-7a [REVIEWED] ENSMUSG00000079477;IPI00408892;P51150 xxxxx	18.0066	11.4042	14.7029	30.8863	0.547642
sp|P07901|HS90A_MOUSE - Hsp90aa1 Heat shock protein HSP 90-alpha [REVIEWED] ENSMUSG00000021270;IPI00330804;P07901 xxxxx	19.9477	35.8048	13.1354	33.1121	-0.254817
sp|O89053|COR1A_MOUSE - Coro1a Coronin-1A [REVIEWED] ENSMUSG00000030707;IPI00323600;O89053;Q7TMU0;Q9R1Y8;Q9R288 xxxxx	35.1204	37.5807	16.5443	34.7546	-0.635726
sp|Q05920|PYC_MOUSE - Pc Pyruvate carboxylase, mitochondrial [REVIEWED] ENSMUSG00000024892;IPI00943457;Q05920 xxxxx	78.0045	98.864	78.9581	33.1734	-0.672972
sp|Q93092|TALDO_MOUSE - Taldo1 Transaldolase [REVIEWED] ENSMUSG00000025503;IPI00124692;Q93092;P70358;P70703;Q52KM4 xxxxx	8.16604	9.60482	13.3356	26.8935	0.758731
sp|O08553|DPYL2_MOUSE - Dpysl2 Dihydropyrimidinase-related protein 2 [REVIEWED] ENSMUSG00000022048;IPI00114375;O08553;Q6P5D0 xxxxx	20.1287	16.8726	21.753	29.2458	0.771222
sp|P97429|ANXA4_MOUSE - Anxa4 Annexin A4 [REVIEWED] ENSMUSG00000029994;IPI00353727;P97429;Q3UCL0 xxxxx	26.4813	22.7905	15.8215	31.9067	-0.0659925
sp|P08752|GNAI2_MOUSE - Gnai2 Guanine nucleotide-binding protein G(i) subunit alpha-2 [REVIEWED] ENSMUSG00000032562;IPI00228617;P08752;Q3TXK7;Q6P1C0 xxxxx	23.5485	32.8224	18.1887	31.4404	-0.282711
sp|P56480|ATPB_MOUSE - Atp5b ATP synthase subunit beta, mitochondrial [REVIEWED] ENSMUSG00000025393;IPI00468481;P56480;Q0QEP4;Q3TFD7;Q3TIP9;Q3TK44;Q3TWD5;Q3TX28;Q3U6U4;Q3U774;Q3UB69;Q3UF69;Q8CI65;Q8VEJ5;Q9CTI7;Q9CWX7 xxxxx	6.07834	10.1528	28.6335	22.1353	0.954055
sp|Q9WVA4|TAGL2_MOUSE - Tagln2 Transgelin-2 [REVIEWED] ENSMUSG00000026547;IPI00125778;Q9WVA4;Q3TIB8;Q6A0C6;Q78ZX2;Q91VU2 xxxxx	9.68423	14.7858	77.4272	19.1028	0.656499
sp|Q5SUA5|MYO1G_MOUSE - Myo1g Unconventional myosin-Ig [REVIEWED] ENSMUSG00000020437;IPI00387204;Q5SUA5;Q8BIT8;Q8BJ17;Q8BJ65;Q8R019;Q91ZI1 xxxxx	6.28279	7.10554	12.8252	24.7865	0.819241
sp|P06151|LDHA_MOUSE - Ldha L-lactate dehydrogenase A chain [REVIEWED] ENSMUSG00000063229;IPI00319994;P06151 xxxxx	9.13706	16.7404	48.4944	21.6282	0.746086
sp|Q9Z1G4|VPP1_MOUSE - Atp6v0a1 V-type proton ATPase 116 kDa subunit a isoform 1 [REVIEWED] ENSMUSG00000019302;IPI00828950;Q9Z1G4;A2A5A1;Q9JHJ4;Q9JL13;Q9JL14 xxxxx	10.2178	8.75815	17.5646	25.4595	0.904273
tr|B9EJ86|B9EJ86_MOUSE - Osbpl8 Oxysterol-binding protein [NOT_REVIEWED] ENSMUSG00000020189;IPI00461290;B9EJ86 xxxxx	6.50439	19.2598	7.24231	27.9935	0.265121
sp|Q8K1B8|URP2_MOUSE - Fermt3 Fermitin family homolog 3 [REVIEWED] ENSMUSG00000024965;IPI00169731;Q8K1B8 xxxxx	7.17037	25.4509	20.2667	26.1121	0.45211
sp|P17427|AP2A2_MOUSE - Ap2a2 AP-2 complex subunit alpha-2 [REVIEWED] ENSMUSG00000002957;IPI00310131;P17427;Q8C2J5;Q921V0 xxxxx	14.7382	14.5468	0	31.715	0.0540991
sp|Q8R0X7|SGPL1_MOUSE - Sgpl1 Sphingosine-1-phosphate lyase 1 [REVIEWED] ENSMUSG00000020097;IPI00320480;Q8R0X7;O54955;Q8C942 xxxxx	20.4819	42.6218	5.57469	32.3216	-0.456693
sp|P57780|ACTN4_MOUSE - Actn4 Alpha-actinin-4 [REVIEWED] ENSMUSG00000054808;IPI00118899;P57780 xxxxx	13.7467	18.6562	39.4938	24.1033	0.806773
sp|P51660|DHB4_MOUSE - Hsd17b4 Peroxisomal multifunctional enzyme type 2 [REVIEWED] ENSMUSG00000024507;IPI00331628;P51660;Q9DBM3 xxxxx	2.04453	5.54943	6.26031	23.1457	0.666637
sp|Q9D0K2|SCOT1_MOUSE - Oxct1 Succinyl-CoA:3-ketoacid coenzyme A transferase 1, mitochondrial [REVIEWED] ENSMUSG00000022186;IPI00132653;Q9D0K2;Q3TIW6;Q9CV92 xxxxx	10.131	10.131	19.5923	24.1457	0.964377
sp|Q3TXS7|PSMD1_MOUSE - Psmd1 26S proteasome non-ATPase regulatory subunit 1 [REVIEWED] ENSMUSG00000026229;IPI00267295;Q3TXS7;B2RRP8 xxxxx	8.30929	14.7467	0	28.944	0.13905
tr|Q9JHF5|Q9JHF5_MOUSE - Tcirg1 T-cell, immune regulator 1, ATPase, H+ transporting, lysosomal V0 protein A3, isoform CRA_b [NOT_REVIEWED] ENSMUSG00000001750;IPI00914724;Q9JHF5 xxxxx	10.3174	13.3355	34.0991	22.248	0.883942
sp|P29391|FRIL1_MOUSE - Ftl1 Ferritin light chain 1 [REVIEWED] ENSMUSG00000050708;ENSMUSG00000057829;IPI00762203;P29391;Q8WUQ8 xxxxx	17.9528	36.2344	93.9677	20.8452	0.494386
sp|O08529|CAN2_MOUSE - Capn2 Calpain-2 catalytic subunit [REVIEWED] ENSMUSG00000026509;IPI00308938;O08529;O35518;O54843 xxxxx	19.0706	24.0965	8.05431	29.7786	-0.166787
sp|Q6PIC6|AT1A3_MOUSE - Atp1a3 Sodium/potassium-transporting ATPase subunit alpha-3 [REVIEWED] ENSMUSG00000040907;IPI00122048;Q6PIC6 xxxxx	14.3051	17.257	32.4459	23.992	0.89117
sp|P17751|TPIS_MOUSE - Tpi1 Triosephosphate isomerase [REVIEWED] ENSMUSG00000023456;IPI00988063;P17751;Q3TJH2;Q3UC04;Q3UKG9;Q64513;Q9CVF9;Q9CWE7 xxxxx	18.0792	30.6701	61.5093	22.7413	0.52439
sp|P62267|RS23_MOUSE - Rps23 40S ribosomal protein S23 [REVIEWED] ENSMUSG00000049517;ENSMUSG00000063001;IPI00972920;P62267;P39028;Q542K7 xxxxx	0	3.06855	7.3848	19.5466	0.802555
tr|Q8K1X4|Q8K1X4_MOUSE - Nckap1l NCK associated protein 1 like [NOT_REVIEWED] ENSMUSG00000022488;IPI00169846;Q8K1X4 xxxxx	2.54981	8.99717	10.41	22.0431	0.7434
sp|Q9Z1Q9|SYVC_MOUSE - Vars Valine--tRNA ligase [REVIEWED] ENSMUSG00000007029;IPI00130353;Q9Z1Q9;Q9QUN2 xxxxx	7.18783	9.75491	18.8649	22.1924	0.970944
sp|Q9QXX4|CMC2_MOUSE - Slc25a13 Calcium-binding mitochondrial carrier protein Aralar2 [REVIEWED] ENSMUSG00000015112;IPI00135651;Q9QXX4;Q9CZF6;Q9DCF5 xxxxx	4.87224	15.2084	25.8591	21.0603	0.857312
sp|P11835|ITB2_MOUSE - Itgb2 Integrin beta-2 [REVIEWED] ENSMUSG00000000290;IPI00320605;P11835;Q64482 xxxxx	14.8554	20.1608	29.2015	23.7823	0.858657
sp|Q99LR1|ABD12_MOUSE - Abhd12 Monoacylglycerol lipase ABHD12 [REVIEWED] ENSMUSG00000032046;IPI00165731;Q99LR1;A2ANB4;Q99M06 xxxxx	16.6023	21.078	37.1703	23.1494	0.736159
sp|Q9CPW4|ARPC5_MOUSE - Arpc5 Actin-related protein 2/3 complex subunit 5 [REVIEWED] ENSMUSG00000008475;IPI00399943;Q9CPW4;Q3U9T3;Q9D8E7 xxxxx	2.62723	8.31957	25.0275	18.0257	0.929284
sp|Q61207|SAP_MOUSE - Psap Sulfated glycoprotein 1 [REVIEWED] ENSMUSG00000004207;IPI00321190;Q61207;Q60861;Q64006;Q64219 xxxxx	4.6842	10.1714	24.8611	19.2833	0.935464
sp|Q8CGC7|SYEP_MOUSE - Eprs Bifunctional glutamate/proline--tRNA ligase [REVIEWED] ENSMUSG00000026615;IPI00339916;Q8CGC7;E9QKC4;Q3UFJ2;Q4VC16 xxxxx	2.12845	12.2766	8.6897	21.9053	0.56628
sp|Q99KC8|VMA5A_MOUSE - Vwa5a von Willebrand factor A domain-containing protein 5A [REVIEWED] ENSMUSG00000023186;IPI00221817;Q99KC8;Q3TTU2;Q3UVU1;Q3V3F2;Q6UN22;Q8BHA8;Q9CTV9 xxxxx	5.87794	13.9601	25.9973	20.1646	0.881571
sp|Q8BMF4|ODP2_MOUSE - Dlat Dihydrolipoyllysine-residue acetyltransferase component of pyruvate dehydrogenase complex, mitochondrial [REVIEWED] ENSMUSG00000000168;IPI00153660;Q8BMF4;Q8K2G8;Q8R339;Q91ZB1 xxxxx	1.95768	21.919	25.9756	20.1477	0.603304
sp|Q9EQK5|MVP_MOUSE - Mvp Major vault protein [REVIEWED] ENSMUSG00000030681;IPI00986977;Q9EQK5;Q922X6 xxxxx	6.24913	11.0253	0	25.7256	0.222658
sp|Q8VEM8|MPCP_MOUSE - Slc25a3 Phosphate carrier protein, mitochondrial [REVIEWED] ENSMUSG00000061904;IPI00124771;Q8VEM8;Q542V7 xxxxx	15.8359	26.8645	30.0171	23.2825	0.501716
tr|D3YU93|D3YU93_MOUSE - Rpl7a-ps3 Uncharacterized protein [NOT_REVIEWED] ENSMUSG00000068579;IPI00265107;D3YU93 xxxxx	4.75516	0	11.6482	18.5967	0.906017
tr|F6U2H0|F6U2H0_MOUSE - Rpl7a-ps5 Uncharacterized protein [NOT_REVIEWED] ENSMUSG00000071052;IPI00462006;F6U2H0 xxxxx	4.75516	0	11.6482	18.5967	0.906017
sp|Q8BIJ6|SYIM_MOUSE - Iars2 Isoleucine--tRNA ligase, mitochondrial [REVIEWED] ENSMUSG00000026618;IPI00453499;Q8BIJ6;Q3TKT8;Q8BIJ0;Q8BIP3 xxxxx	0.966381	5.24607	7.89078	18.8968	0.77643
sp|Q64282|IFIT1_MOUSE - Ifit1 Interferon-induced protein with tetratricopeptide repeats 1 [REVIEWED] ENSMUSG00000034459;IPI00132290;Q64282;Q99L77 xxxxx	1.64083	2.96912	0	21.39	0.484366
tr|D3Z3R0|D3Z3R0_MOUSE - Gm16477 Uncharacterized protein [NOT_REVIEWED] ENSMUSG00000062758;IPI00622160;D3Z3R0 xxxxx	5.22862	8.51518	12.808	20.4483	0.856429
sp|Q8VCT3|AMPB_MOUSE - Rnpep Aminopeptidase B [REVIEWED] ENSMUSG00000041926;IPI00122529;Q8VCT3;Q3TX27 xxxxx	5.43988	4.9218	0	23.6383	0.369031
sp|Q9DBG3|AP2B1_MOUSE - Ap2b1 AP-2 complex subunit beta [REVIEWED] ENSMUSG00000035152;IPI00378063;Q9DBG3;Q80XJ4 xxxxx	5.80671	11.4626	15.0861	20.6446	0.854662
tr|D3YVE6|D3YVE6_MOUSE - Uncharacterized protein [NOT_REVIEWED] ENSMUSG00000094089;;D3YVE6 xxxxx	6.26968	10.2106	0	24.5197	0.223133
sp|P14901|HMOX1_MOUSE - Hmox1 Heme oxygenase 1 [REVIEWED] ENSMUSG00000005413;IPI00131577;P14901 xxxxx	6.29488	13.9795	9.34537	22.3802	0.471816
sp|P80313|TCPH_MOUSE - Cct7 T-complex protein 1 subunit eta [REVIEWED] ENSMUSG00000030007;IPI00331174;P80313 xxxxx	13.3166	7.85763	14.1827	22.6431	0.73969
sp|P99029|PRDX5_MOUSE - Prdx5 Peroxiredoxin-5, mitochondrial [REVIEWED] ENSMUSG00000024953;IPI00759999;P99029;Q9QX45;Q9QZ75 xxxxx	7.41466	17.2504	21.6224	20.7125	0.784464
sp|P68040|GBLP_MOUSE - Gnb2l1 Guanine nucleotide-binding protein subunit beta-2-like 1 [REVIEWED] ENSMUSG00000020372;IPI00317740;P68040;P25388;P99049;Q3THP0;Q3THY7;Q3TKQ0;Q3TW88;Q5NCC5;Q5NCC6;Q9CSQ0;Q9ERM6 xxxxx	8.04343	15.2825	19.7031	20.971	0.857829
sp|Q9D8N0|EF1G_MOUSE - Eef1g Elongation factor 1-gamma [REVIEWED] ENSMUSG00000071644;IPI00318841;Q9D8N0;Q920C5;Q9CRT5;Q9CSU3;Q9D004 xxxxx	14.5703	12.896	7.75894	24.7747	0.205111
sp|Q9R0P3|ESTD_MOUSE - Esd S-formylglutathione hydrolase [REVIEWED] ENSMUSG00000021996;IPI00109142;Q9R0P3;Q80ZX4;Q9CWI4 xxxxx	17.139	22.4294	17.4931	23.9385	0.156067
sp|Q9CPR4|RL17_MOUSE - Rpl17 60S ribosomal protein L17 [REVIEWED] ENSMUSG00000062328;ENSMUSG00000067748;IPI00453768;Q9CPR4 xxxxx	1.64913	2.98414	0	20.3667	0.478596
sp|P54071|IDHP_MOUSE - Idh2 Isocitrate dehydrogenase [NADP], mitochondrial [REVIEWED] ENSMUSG00000030541;IPI00318614;P54071;Q8C2R9;Q9EQK1 xxxxx	4.94541	5.96589	6.73011	20.3586	0.641848
sp|P61205|ARF3_MOUSE - Arf3 ADP-ribosylation factor 3 [REVIEWED] ENSMUSG00000051853;IPI00221614;P61205;P16587 xxxxx	8.77571	0	0	23.2243	0.380552
sp|P84078|ARF1_MOUSE - Arf1 ADP-ribosylation factor 1 [REVIEWED] ENSMUSG00000048076;IPI00221613;P84078;P10947;P32889;Q3THZ2;Q3U849;Q3UDG1;Q3UF76 xxxxx	8.77571	0	0	23.2243	0.380552
sp|Q9QWR8|NAGAB_MOUSE - Naga Alpha-N-acetylgalactosaminidase [REVIEWED] ENSMUSG00000022453;IPI00315593;Q9QWR8;O88620;Q8R437;Q8VDK2 xxxxx	7.03391	5.87447	11.045	20.0466	0.816964
sp|P51569|AGAL_MOUSE - Gla Alpha-galactosidase A [REVIEWED] ENSMUSG00000031266;IPI00123814;P51569 xxxxx	8.98962	4.30595	15.1123	19.5921	0.919294
sp|Q9CZ13|QCR1_MOUSE - Uqcrc1 Cytochrome b-c1 complex subunit 1, mitochondrial [REVIEWED] ENSMUSG00000025651;IPI00111885;Q9CZ13;Q3TV75;Q9CWL6 xxxxx	7.07528	13.0939	0	23.8308	0.104762
sp|P05555|ITAM_MOUSE - Itgam Integrin alpha-M [REVIEWED] ENSMUSG00000030786;IPI00876475;P05555;Q8CA73 xxxxx	9.07457	17.7035	16.2086	21.0133	0.598836
tr|Q9CZN7|Q9CZN7_MOUSE - Shmt2 Protein Shmt2 [NOT_REVIEWED] ENSMUSG00000025403;IPI00454008;Q9CZN7 xxxxx	4.3097	3.24938	13.685	16.7559	0.98043
sp|P26043|RADI_MOUSE - Rdx Radixin [REVIEWED] ENSMUSG00000032050;IPI00308324;P26043;Q3TS85;Q9QW27 xxxxx	11.0787	0	40.0113	14.91	0.74884
sp|Q62230|SN_MOUSE - Siglec1 Sialoadhesin [REVIEWED] ENSMUSG00000027322;IPI01027499;Q62230;D3YVZ3;D3YVZ4;O55216;Q62228;Q62229 xxxxx	7.79333	5.28833	21.8745	17.0439	0.958392
sp|Q80X95|RRAGA_MOUSE - Rraga Ras-related GTP-binding protein A [REVIEWED] ENSMUSG00000070934;IPI00229392;Q80X95;B1AXR0;Q8C1S2;Q8CFU3 xxxxx	3.5413	4.80605	0	20.6527	0.387642
sp|O35405|PLD3_MOUSE - Pld3 Phospholipase D3 [REVIEWED] ENSMUSG00000003363;IPI00130624;O35405;Q3U5M5 xxxxx	3.58735	6.4914	0	20.9212	0.341198
sp|Q99JY0|ECHB_MOUSE - Hadhb Trifunctional enzyme subunit beta, mitochondrial [REVIEWED] ENSMUSG00000059447;ENSMUSG00000063684;IPI00115607;Q99JY0;Q3TEH9;Q8BJI5;Q8BJM0;Q8BK52 xxxxx	3.87095	9.00588	6.77302	19.3501	0.567635
sp|O55029|COPB2_MOUSE - Copb2 Coatomer subunit beta' [REVIEWED] ENSMUSG00000032458;IPI00115097;O55029;Q3U5Z9 xxxxx	7.64715	6.05399	0	22.2989	0.262414
sp|P48962|ADT1_MOUSE - Slc25a4 ADP/ATP translocase 1 [REVIEWED] ENSMUSG00000031633;IPI00115564;P48962;Q62164 xxxxx	7.01306	12.9169	24.5416	17.5285	0.862939
sp|Q8BG07|PLD4_MOUSE - Pld4 Phospholipase D4 [REVIEWED] ENSMUSG00000052160;IPI00831033;Q8BG07;Q3TD59;Q3UA19;Q6PDR0;Q8BR69 xxxxx	12.1689	9.17497	0	23.6561	0.0684081
sp|Q9EQH3|VPS35_MOUSE - Vps35 Vacuolar protein sorting-associated protein 35 [REVIEWED] ENSMUSG00000031696;IPI00111181;Q9EQH3;Q61123 xxxxx	8.52625	15.704	7.45921	21.3106	0.201536
sp|P60843|IF4A1_MOUSE - Eif4a1 Eukaryotic initiation factor 4A-I [REVIEWED] ENSMUSG00000059796;ENSMUSG00000064241;IPI00118676;P60843;P04765;Q61516 xxxxx	11.7789	15.1863	14.4267	20.6081	0.628674
sp|P08249|MDHM_MOUSE - Mdh2 Malate dehydrogenase, mitochondrial [REVIEWED] ENSMUSG00000019179;IPI00323592;P08249;Q0QF44;Q8CF79;Q8R1P0 xxxxx	31.5233	23.1021	28.3136	22.061	-0.275476
sp|Q00612|G6PD1_MOUSE - G6pdx Glucose-6-phosphate 1-dehydrogenase X [REVIEWED] ENSMUSG00000031400;IPI00228385;Q00612 xxxxx	16.4833	22.3702	8.07545	23.0711	-0.320441
sp|P14148|RL7_MOUSE - Rpl7 60S ribosomal protein L7 [REVIEWED] ENSMUSG00000043716;IPI00311236;P14148;Q80UR0 xxxxx	2.72473	6.77938	18.5402	14.9557	0.952698
sp|P28867|KPCD_MOUSE - Prkcd Protein kinase C delta type [REVIEWED] ENSMUSG00000021948;IPI00227880;P28867;Q91V85;Q9Z333 xxxxx	0	2.83019	0	17.1698	0.503455
sp|Q3UQ44|IQGA2_MOUSE - Iqgap2 Ras GTPase-activating-like protein IQGAP2 [REVIEWED] ENSMUSG00000021676;IPI00406193;Q3UQ44 xxxxx	5.21557	11.2073	37.2633	14.3138	0.723489
sp|Q99K51|PLST_MOUSE - Pls3 Plastin-3 [REVIEWED] ENSMUSG00000016382;IPI00115528;Q99K51;B1AX56;Q3TUZ5 xxxxx	3.39041	0	0	18.6096	0.494492
sp|O35643|AP1B1_MOUSE - Ap1b1 AP-1 complex subunit beta-1 [REVIEWED] ENSMUSG00000009090;IPI00346965;O35643;Q3TXG4;Q922E2 xxxxx	3.33969	8.41739	17.5304	15.7125	0.942382
sp|Q810B6|ANFY1_MOUSE - Ankfy1 Ankyrin repeat and FYVE domain-containing protein 1 [REVIEWED] ENSMUSG00000020790;IPI00329843;Q810B6;B1ATS3;O54807;Q80TG6;Q80UH8 xxxxx	1.7168	5.43654	0	18.8467	0.395352
sp|Q9EQ06|DHB11_MOUSE - Hsd17b11 Estradiol 17-beta-dehydrogenase 11 [REVIEWED] ENSMUSG00000029311;IPI00648201;Q9EQ06;Q3U2P6;Q8BR33;Q8C7S0 xxxxx	3.59257	5.68823	0	19.7192	0.348832
sp|Q8C147|DOCK8_MOUSE - Dock8 Dedicator of cytokinesis protein 8 [REVIEWED] ENSMUSG00000052085;IPI00475383;Q8C147;Q6KAM7;Q6PIS0;Q7TMQ5;Q8CAP6;Q8K105;Q9DBQ2 xxxxx	2.0591	10.4794	10.5082	16.9533	0.705381
sp|Q6ZQ38|CAND1_MOUSE - Cand1 Cullin-associated NEDD8-dissociated protein 1 [REVIEWED] ENSMUSG00000020114;IPI00896727;Q6ZQ38;Q6PFR0;Q9CV45 xxxxx	1.79184	10.5377	0	19.6704	0.234409
sp|P17710|HXK1_MOUSE - Hk1 Hexokinase-1 [REVIEWED] ENSMUSG00000037012;IPI00759938;P17710;E9PXQ3;Q61659;Q64476;Q64479 xxxxx	10.1612	10.0292	39.5987	15.2109	0.708428
sp|P62821|RAB1A_MOUSE - Rab1A Ras-related protein Rab-1A [REVIEWED] ENSMUSG00000020149;IPI00114560;P62821;P11476;Q3TX44;Q811M4;Q96N61;Q9Y3T2 xxxxx	6.308	7.7826	7.02363	18.8858	0.572991
sp|P29351|PTN6_MOUSE - Ptpn6 Tyrosine-protein phosphatase non-receptor type 6 [REVIEWED] ENSMUSG00000004266;IPI00310909;P29351;O35128;Q63872;Q63873;Q63874;Q921G3;Q9QVA6;Q9QVA7;Q9QVA8;Q9R0V6 xxxxx	9.17897	6.22859	0	21.5924	0.196754
sp|E9Q634|MYO1E_MOUSE - Myo1e Unconventional myosin-Ie [REVIEWED] ENSMUSG00000032220;IPI00330649;E9Q634;Q80X36;Q91ZI4 xxxxx	5.12462	14.779	0	21.0963	0.036327
sp|O35855|BCAT2_MOUSE - Bcat2 Branched-chain-amino-acid aminotransferase, mitochondrial [REVIEWED] ENSMUSG00000030826;IPI00122442;O35855;Q8VD03 xxxxx	13.0324	8.378	0	22.5896	0.0361264
sp|P47754|CAZA2_MOUSE - Capza2 F-actin-capping protein subunit alpha-2 [REVIEWED] ENSMUSG00000015733;IPI00111265;P47754 xxxxx	7.83912	16.7181	16.0022	18.4406	0.604657
sp|P62137|PP1A_MOUSE - Ppp1ca Serine/threonine-protein phosphatase PP1-alpha catalytic subunit [REVIEWED] ENSMUSG00000040385;IPI00130185;P62137;P08129;P20653;P22802;Q3U7G7;Q9Z1G2 xxxxx	14.1064	13.9232	7.8534	21.1169	0.0500794
sp|P62259|1433E_MOUSE - Ywhae 14-3-3 protein epsilon [REVIEWED] ENSMUSG00000020849;IPI00118384;P62259;P29360;P42655;Q63631 xxxxx	23.6627	14.2727	13.4176	21.647	-0.16048
sp|P43276|H15_MOUSE - Hist1h1b Histone H1.5 [REVIEWED] ENSMUSG00000058773;IPI00230133;P43276;Q9CRM8 xxxxx	0	0	0	15	0.57735
tr|Q5RKN9|Q5RKN9_MOUSE - Capza1 Capping protein (Actin filament) muscle Z-line, alpha 1 [NOT_REVIEWED] ENSMUSG00000070372;IPI00877182;Q5RKN9 xxxxx	2.25181	9.77928	22.064	13.9049	0.836207
sp|P35980|RL18_MOUSE - Rpl18 60S ribosomal protein L18 [REVIEWED] ENSMUSG00000059070;IPI00555113;P35980;Q9CQF1;Q9D987 xxxxx	3.51679	2.38639	0	18.0968	0.429441
sp|Q9QUI0|RHOA_MOUSE - Rhoa Transforming protein RhoA [REVIEWED] ENSMUSG00000007815;IPI00315100;Q9QUI0;O88336 xxxxx	4.20289	3.25938	0	18.5377	0.388735
sp|Q8K411|PREP_MOUSE - Pitrm1 Presequence protease, mitochondrial [REVIEWED] ENSMUSG00000021193;IPI00788353;Q8K411;Q3THC4;Q3TJI1;Q3TPP0;Q3URQ8;Q4KUG2;Q4KUG3;Q6ZPX6;Q922N1;Q9CV63 xxxxx	3.66679	7.46453	0	18.8687	0.273426
tr|G5E829|G5E829_MOUSE - Atp2b1 MCG13663, isoform CRA_a [NOT_REVIEWED] ENSMUSG00000019943;;G5E829 xxxxx	2.42373	9.86806	0	18.7082	0.219822
sp|P58681|TLR7_MOUSE - Tlr7 Toll-like receptor 7 [REVIEWED] ENSMUSG00000044583;IPI00122181;P58681;Q923I1 xxxxx	5.31667	9.62064	4.82357	18.2391	0.377609
tr|Q8BML9|Q8BML9_MOUSE - Qars Glutaminyl-tRNA synthetase [NOT_REVIEWED] ENSMUSG00000032604;IPI00223055;Q8BML9 xxxxx	5.61134	9.90001	9.16364	17.325	0.644052
sp|P70168|IMB1_MOUSE - Kpnb1 Importin subunit beta-1 [REVIEWED] ENSMUSG00000001440;IPI00323881;P70168;Q62117;Q6GTI5 xxxxx	6.55181	14.6079	34.3912	14.4491	0.67306
sp|Q8BWT1|THIM_MOUSE - Acaa2 3-ketoacyl-CoA thiolase, mitochondrial [REVIEWED] ENSMUSG00000036880;IPI00226430;Q8BWT1;Q3TIT9;Q8JZR8 xxxxx	9.29446	7.20795	0	20.4976	0.135843
sp|Q9WUM3|COR1B_MOUSE - Coro1b Coronin-1B [REVIEWED] ENSMUSG00000024835;IPI00124819;Q9WUM3;Q3UEB1;Q9CVA2 xxxxx	5.4566	13.3297	13.3664	16.8473	0.684398
sp|Q9WU78|PDC6I_MOUSE - Pdcd6ip Programmed cell death 6-interacting protein [REVIEWED] ENSMUSG00000032504;IPI00468415;Q9WU78;O88695;O89014;Q3TED2;Q8BSL8;Q8R0H5;Q99LR3;Q9QZN8 xxxxx	7.38096	16.1813	13.9079	17.5298	0.505051
sp|P24452|CAPG_MOUSE - Capg Macrophage-capping protein [REVIEWED] ENSMUSG00000056737;IPI00136906;P24452 xxxxx	10.7144	17.107	7.71936	19.4592	-0.0339837
sp|O88844|IDHC_MOUSE - Idh1 Isocitrate dehydrogenase [NADP] cytoplasmic [REVIEWED] ENSMUSG00000025950;IPI00762452;O88844;Q3UAV7 xxxxx	12.8361	15.1481	22.7848	17.231	0.816495
sp|Q8BH04|PCKGM_MOUSE - Pck2 Phosphoenolpyruvate carboxykinase [GTP], mitochondrial [REVIEWED] ENSMUSG00000040618;IPI00223060;Q8BH04;Q8BMM9;Q91Z10 xxxxx	9.69556	12.4657	27.0835	15.7553	0.78178
sp|Q60605|MYL6_MOUSE - Myl6 Myosin light polypeptide 6 [REVIEWED] ENSMUSG00000090841;ENSMUSG00000060680;IPI00409817;Q60605 xxxxx	16.7894	18.2285	29.7029	17.2791	0.56028
sp|Q3TCN2|PLBL2_MOUSE - Plbd2 Putative phospholipase B-like 2 [REVIEWED] ENSMUSG00000029598;IPI00845794;Q3TCN2;Q3TD43;Q3TPP8;Q8BHG8;Q8BMB6;Q8BXI3;Q8C0M4;Q8R0V3;Q9DBG4;Q9EQI9 xxxxx	0.882552	5.98875	14.4126	12.7161	0.936134
sp|Q8BMJ2|SYLC_MOUSE - Lars Leucine--tRNA ligase, cytoplasmic [REVIEWED] ENSMUSG00000024493;IPI00453819;Q8BMJ2;Q8BKW9 xxxxx	4.62548	6.97494	12.5895	14.8101	0.960589
sp|Q9DB77|QCR2_MOUSE - Uqcrc2 Cytochrome b-c1 complex subunit 2, mitochondrial [REVIEWED] ENSMUSG00000030884;IPI00119138;Q9DB77;Q8BK11;Q9CVK7 xxxxx	1.66595	9.79737	4.53432	16.0024	0.415181
sp|Q8VEB4|PAG15_MOUSE - Pla2g15 Group XV phospholipase A2 [REVIEWED] ENSMUSG00000031903;IPI00124428;Q8VEB4;Q3TCB1;Q3U303 xxxxx	4.34933	6.74591	0	17.9048	0.257556
sp|P08228|SODC_MOUSE - Sod1 Superoxide dismutase [Cu-Zn] [REVIEWED] ENSMUSG00000047905;ENSMUSG00000022982;IPI00130589;P08228 xxxxx	3.07722	9.18771	0	17.7351	0.201953
sp|P26040|EZRI_MOUSE - Ezr Ezrin [REVIEWED] ENSMUSG00000052397;IPI00330862;P26040;Q80ZT8;Q9DCI1 xxxxx	11.5024	0	0	19.4976	0.242298
sp|Q9JKR6|HYOU1_MOUSE - Hyou1 Hypoxia up-regulated protein 1 [REVIEWED] ENSMUSG00000032115;IPI00123342;Q9JKR6;Q3TAL1;Q3TZD0;Q3U1U2;Q64139;Q80X75 xxxxx	3.81143	9.60636	8.89183	15.6904	0.662199
sp|Q9EP69|SAC1_MOUSE - Sacm1l Phosphatidylinositide phosphatase SAC1 [REVIEWED] ENSMUSG00000025240;IPI00109221;Q9EP69;Q80TQ1;Q99K33 xxxxx	7.34736	6.13626	9.22974	16.2866	0.76513
sp|Q91V41|RAB14_MOUSE - Rab14 Ras-related protein Rab-14 [REVIEWED] ENSMUSG00000026878;IPI00126042;Q91V41 xxxxx	4.45197	11.2208	0	18.3273	0.095634
sp|Q8CBB9|RSAD2_MOUSE - Rsad2 Radical S-adenosyl methionine domain-containing protein 2 [REVIEWED] ENSMUSG00000020641;IPI00468281;Q8CBB9;Q3U5I6;Q3U5T4;Q3U622;Q3U627;Q3U7I6;Q3U7M1;Q3U8F4;Q3U8U7;Q3U941;Q3U977;Q3U9E1;Q3U9J0;Q3U9J3;Q3UBW6;Q3UC07;Q3UDI0;Q6PEU4;Q8VHM2;Q9JHD4 xxxxx	4.51704	14.8878	0	18.5952	-0.0268805
sp|Q61316|HSP74_MOUSE - Hspa4 Heat shock 70 kDa protein 4 [REVIEWED] ENSMUSG00000020361;IPI00331556;Q61316 xxxxx	5.91726	12.7151	24.1581	14.2096	0.756902
sp|P23492|PNPH_MOUSE - Pnp Purine nucleoside phosphorylase [REVIEWED] ENSMUSG00000021871;IPI00315452;P23492;Q4FJT6 xxxxx	9.18181	8.56696	11.7144	16.5368	0.836672
sp|Q78PY7|SND1_MOUSE - Snd1 Staphylococcal nuclease domain-containing protein 1 [REVIEWED] ENSMUSG00000001424;IPI00123129;Q78PY7;Q3TT46;Q922L5;Q9R0S1 xxxxx	10.98	10.2447	0	19.7754	-0.0517171
tr|Q8CG29|Q8CG29_MOUSE - Myo1f Unconventional myosin-If [NOT_REVIEWED] ENSMUSG00000024300;IPI00336672;Q8CG29 xxxxx	6.23682	13.8506	11.574	16.3386	0.524509
sp|Q9WTR1|TRPV2_MOUSE - Trpv2 Transient receptor potential cation channel subfamily V member 2 [REVIEWED] ENSMUSG00000018507;IPI00322698;Q9WTR1;Q99K71 xxxxx	10.268	13.0061	0	19.7259	-0.124993
sp|P51174|ACADL_MOUSE - Acadl Long-chain specific acyl-CoA dehydrogenase, mitochondrial [REVIEWED] ENSMUSG00000026003;IPI00119114;P51174;B2KGC6;O35302;Q8QZR6;Q9CU29;Q9DB83 xxxxx	7.56708	13.2038	17.6535	15.5756	0.826176
sp|P04104|K2C1_MOUSE - Krt1 Keratin, type II cytoskeletal 1 [REVIEWED] ENSMUSG00000046834;IPI00625729;P04104;Q149E0;Q9D2K8 xxxxx	3.85228	6.53512	15.7275	12.8851	0.956955
sp|P28650|PURA1_MOUSE - Adssl1 Adenylosuccinate synthetase isozyme 1 [REVIEWED] ENSMUSG00000011148;IPI00229690;P28650;Q8CHQ1 xxxxx	3.2698	3.69799	4.44981	14.5824	0.643717
sp|P46460|NSF_MOUSE - Nsf Vesicle-fusing ATPase [REVIEWED] ENSMUSG00000034187;IPI00656325;P46460;A2A646;Q8BQ65;Q8C3R2;Q8CCT9;Q8CEF0;Q923C6 xxxxx	0	6.06133	0	14.9387	0.362835
sp|P51863|VA0D1_MOUSE - Atp6v0d1 V-type proton ATPase subunit d 1 [REVIEWED] ENSMUSG00000013160;IPI00313841;P51863;Q54A57;Q9QWJ2 xxxxx	3.6138	3.26963	0	16.1166	0.375388
sp|P12382|K6PL_MOUSE - Pfkl 6-phosphofructokinase, liver type [REVIEWED] ENSMUSG00000020277;IPI00554862;P12382;Q8VDX7 xxxxx	3.33177	5.27531	4.53415	14.8588	0.587468
sp|P28063|PSB8_MOUSE - Psmb8 Proteasome subunit beta type-8 [REVIEWED] ENSMUSG00000024338;IPI00116712;P28063;Q3UK42;Q64300;Q792S8;Q7TMX9;Q91VH7 xxxxx	3.64151	4.11837	0	16.2401	0.346247
sp|P42932|TCPQ_MOUSE - Cct8 T-complex protein 1 subunit theta [REVIEWED] ENSMUSG00000025613;IPI00469268;P42932 xxxxx	5.64904	2.55552	0	16.7954	0.335132
sp|Q80X90|FLNB_MOUSE - Flnb Filamin-B [REVIEWED] ENSMUSG00000025278;IPI00663627;Q80X90;E9QNV9;Q8VHX4;Q8VHX7;Q99KY3 xxxxx	4.51114	12.2445	0	17.2444	0.0182819
sp|Q76MZ3|2AAA_MOUSE - Ppp2r1a Serine/threonine-protein phosphatase 2A 65 kDa regulatory subunit A alpha isoform [REVIEWED] ENSMUSG00000007564;IPI00310091;Q76MZ3 xxxxx	5.84411	9.25318	21.8711	13.0316	0.828269
sp|O08749|DLDH_MOUSE - Dld Dihydrolipoyl dehydrogenase, mitochondrial [REVIEWED] ENSMUSG00000020664;IPI00874456;O08749;Q3TG55;Q3U5W5;Q3UWP7;Q99LD3 xxxxx	12.6661	10.5048	0	18.8291	-0.159905
sp|Q60930|VDAC2_MOUSE - Vdac2 Voltage-dependent anion-selective channel protein 2 [REVIEWED] ENSMUSG00000021771;IPI00122547;Q60930;Q78MH6;Q99L98 xxxxx	12.5653	13.5003	29.9249	14.0095	0.621117
sp|P05063|ALDOC_MOUSE - Aldoc Fructose-bisphosphate aldolase C [REVIEWED] ENSMUSG00000017390;IPI00119458;P05063;Q64011;Q8CA91;Q99K96;Q9DBA4;Q9JK32 xxxxx	40.3281	40.5414	9.14695	19.9835	-0.958807
sp|Q6PB66|LPPRC_MOUSE - Lrpprc Leucine-rich PPR motif-containing protein, mitochondrial [REVIEWED] ENSMUSG00000024120;IPI00420706;Q6PB66;Q8K4V0;Q9CRX4 xxxxx	0	3.31434	11.6322	10.0535	0.962312
sp|P27870|VAV_MOUSE - Vav1 Proto-oncogene vav [REVIEWED] ENSMUSG00000034116;IPI00322118;P27870;Q8BTV7 xxxxx	3.67403	6.23273	18.7497	11.3436	0.876606
sp|P54987|IRG1_MOUSE - Irg1 Immune-responsive gene 1 protein [REVIEWED] ENSMUSG00000022126;IPI00111285;P54987;Q3TAA1;Q3U8E8;Q8CBA6 xxxxx	0	2.12264	0	12.8774	0.503455
sp|Q91VR2|ATPG_MOUSE - Atp5c1 ATP synthase subunit gamma, mitochondrial [REVIEWED] ENSMUSG00000025781;IPI00313475;Q91VR2 xxxxx	0	2.88288	0	13.1171	0.474357
sp|Q9D8U8|SNX5_MOUSE - Snx5 Sorting nexin-5 [REVIEWED] ENSMUSG00000027423;IPI00112053;Q9D8U8;Q543N9 xxxxx	0	2.88288	0	13.1171	0.474357
sp|Q9EPU0|RENT1_MOUSE - Upf1 Regulator of nonsense transcripts 1 [REVIEWED] ENSMUSG00000058301;IPI00850525;Q9EPU0;Q3UG00;Q6GYP5;Q6PHQ5;Q8K0N4;Q99PR4 xxxxx	2.86195	0	0	14.138	0.48377
sp|Q3V0K9|PLSI_MOUSE - Pls1 Plastin-1 [REVIEWED] ENSMUSG00000049493;IPI00344681;Q3V0K9 xxxxx	2.86195	0	0	14.138	0.48377
sp|Q61263|SOAT1_MOUSE - Soat1 Sterol O-acyltransferase 1 [REVIEWED] ENSMUSG00000026600;IPI00278153;Q61263;Q5XK32;Q64180 xxxxx	0	3.66379	0	13.3362	0.443283
sp|Q924Z4|CERS2_MOUSE - Cers2 Ceramide synthase 2 [REVIEWED] ENSMUSG00000015714;IPI00126253;Q924Z4;Q3TXC5;Q9DCN6 xxxxx	1.72057	3.11341	0	14.166	0.420584
sp|Q61425|HCDH_MOUSE - Hadh Hydroxyacyl-coenzyme A dehydrogenase, mitochondrial [REVIEWED] ENSMUSG00000027984;IPI00121105;Q61425;Q3TF75;Q3THK8;Q3UFI0;Q8K149;Q925U9 xxxxx	2.15679	5.12237	4.4027	13.3182	0.617874
sp|Q91VD9|NDUS1_MOUSE - Ndufs1 NADH-ubiquinone oxidoreductase 75 kDa subunit, mitochondrial [REVIEWED] ENSMUSG00000025968;IPI00308882;Q91VD9;Q3UQ73;Q8BM16 xxxxx	5.77116	3.56013	10.7098	12.9589	0.954862
sp|Q8BSY0|ASPH_MOUSE - Asph Aspartyl/asparaginyl beta-hydroxylase [REVIEWED] ENSMUSG00000028207;IPI00624896;Q8BSY0;Q9EPA6 xxxxx	3.6814	4.16349	0	15.1551	0.322673
sp|P35564|CALX_MOUSE - Canx Calnexin [REVIEWED] ENSMUSG00000020368;IPI00119618;P35564 xxxxx	2.42687	6.58722	0	14.9859	0.262024
sp|P62242|RS8_MOUSE - Rps8 40S ribosomal protein S8 [REVIEWED] ENSMUSG00000047675;ENSMUSG00000070446;IPI00466820;P62242;P09058;Q8C2G6 xxxxx	5.06512	4.29631	0	15.6386	0.272735
sp|O55143|AT2A2_MOUSE - Atp2a2 Sarcoplasmic/endoplasmic reticulum calcium ATPase 2 [REVIEWED] ENSMUSG00000029467;IPI00468900;O55143;Q9R2A9;Q9WUT5 xxxxx	2.25772	9.19214	4.60873	13.9414	0.396432
sp|P97807|FUMH_MOUSE - Fh Fumarate hydratase, mitochondrial [REVIEWED] ENSMUSG00000026526;IPI00759940;P97807;Q3UIA9;Q99JL0;Q9DCX0 xxxxx	4.41748	5.99515	0	15.5874	0.227434
sp|Q8VDM4|PSMD2_MOUSE - Psmd2 26S proteasome non-ATPase regulatory subunit 2 [REVIEWED] ENSMUSG00000006998;IPI00123494;Q8VDM4 xxxxx	6.88991	3.89608	7.03227	14.1817	0.689254
sp|Q8CIH5|PLCG2_MOUSE - Plcg2 1-phosphatidylinositol 4,5-bisphosphate phosphodiesterase gamma-2 [REVIEWED] ENSMUSG00000034330;IPI00229848;Q8CIH5;Q3UBA8;Q3UQT0;Q8VE69 xxxxx	6.53551	5.32177	0	16.1427	0.183992
sp|Q8CI94|PYGB_MOUSE - Pygb Glycogen phosphorylase, brain form [REVIEWED] ENSMUSG00000033059;IPI00229796;Q8CI94;Q8K283 xxxxx	5.14267	6.97934	0	15.878	0.163913
sp|P62827|RAN_MOUSE - Ran GTP-binding nuclear protein Ran [REVIEWED] ENSMUSG00000029430;IPI00134621;P62827;P17080;P28746;P28747;Q3U954;Q811M2;Q86V08;Q9CSP3;Q9CWI7;Q9CZA2;Q9UDJ5;Q9UEU9 xxxxx	8.76686	4.57611	0	16.657	0.135181
sp|Q9QXZ0|MACF1_MOUSE - Macf1 Microtubule-actin cross-linking factor 1 [REVIEWED] ENSMUSG00000028649;IPI01019257;Q9QXZ0;B1ARU3;P97394;P97395;P97396;Q4PLL5 xxxxx	5.38791	8.93708	4.8882	14.7868	0.338513
sp|P97372|PSME2_MOUSE - Psme2 Proteasome activator complex subunit 2 [REVIEWED] ENSMUSG00000079197;ENSMUSG00000078153;IPI00124225;P97372;O35562 xxxxx	6.62918	8.99674	0	16.3741	0.0319597
sp|P97351|RS3A_MOUSE - Rps3a 40S ribosomal protein S3a [REVIEWED] ENSMUSG00000028081;IPI00331345;P97351 xxxxx	7.38713	10.0254	0	16.5875	-0.0347138
sp|O35604|NPC1_MOUSE - Npc1 Niemann-Pick C1 protein [REVIEWED] ENSMUSG00000024413;IPI00132600;O35604;O35605 xxxxx	5.77383	9.26062	15.0007	12.9649	0.914784
sp|Q91YQ5|RPN1_MOUSE - Rpn1 Dolichyl-diphosphooligosaccharide--protein glycosyltransferase subunit 1 [REVIEWED] ENSMUSG00000030062;IPI00309035;Q91YQ5;Q3U985 xxxxx	7.70566	8.21674	13.4826	13.595	0.997807
sp|Q9CZU6|CISY_MOUSE - Cs Citrate synthase, mitochondrial [REVIEWED] ENSMUSG00000005683;IPI00113141;Q9CZU6;Q3UDP3 xxxxx	7.85099	9.83531	7.3968	14.9169	0.387788
sp|P38647|GRP75_MOUSE - Hspa9 Stress-70 protein, mitochondrial [REVIEWED] ENSMUSG00000024359;IPI00880839;P38647;Q7TSZ0;Q9CQ05 xxxxx	13.0277	8.8402	14.5056	14.6265	0.774953
sp|Q9EPL9|ACOX3_MOUSE - Acox3 Peroxisomal acyl-coenzyme A oxidase 3 [REVIEWED] ENSMUSG00000029098;IPI00318108;Q9EPL9;Q7TPP6;Q80UQ0 xxxxx	8.24496	9.59108	9.6175	14.5465	0.658815
sp|Q922Q8|LRC59_MOUSE - Lrrc59 Leucine-rich repeat-containing protein 59 [REVIEWED] ENSMUSG00000020869;IPI00123281;Q922Q8;Q3TJ35;Q3TLC7;Q3TWT9;Q3TX86 xxxxx	8.57258	10.8032	7.49974	15.1245	0.277759
sp|P70290|EM55_MOUSE - Mpp1 55 kDa erythrocyte membrane protein [REVIEWED] ENSMUSG00000031402;IPI00137706;P70290 xxxxx	2.95138	2.28883	17.2135	9.54631	0.892367
sp|O54734|OST48_MOUSE - Ddost Dolichyl-diphosphooligosaccharide--protein glycosyltransferase 48 kDa subunit [REVIEWED] ENSMUSG00000028757;IPI00117705;O54734;Q8C4P7 xxxxx	3.09797	6.00627	19.8753	10.0205	0.819658
sp|P63323|RS12_MOUSE - Rps12 40S ribosomal protein S12 [REVIEWED] ENSMUSG00000069862;ENSMUSG00000067038;ENSMUSG00000059828;IPI00554850;P63323;P09388;P12728 xxxxx	0	2.23935	8.4207	9.33995	0.97653
sp|P70398|USP9X_MOUSE - Usp9x Probable ubiquitin carboxyl-terminal hydrolase FAF-X [REVIEWED] ENSMUSG00000031010;IPI00108388;P70398;E9QLY0;Q62497 xxxxx	0	3.78452	5.69242	10.5231	0.819951
sp|P11983|TCPA_MOUSE - Tcp1 T-complex protein 1 subunit alpha [REVIEWED] ENSMUSG00000068039;IPI00845611;P11983;P11984;Q3TJ96;Q3TKU1;Q3U5T8;Q3U7I8;Q3UAA8;Q3UB80;Q3UE48 xxxxx	1.63796	0	0	12.362	0.519576
sp|P62281|RS11_MOUSE - Rps11 40S ribosomal protein S11 [REVIEWED] ENSMUSG00000003429;IPI00762542;P62281;P04643 xxxxx	0	3.68947	0	12.3105	0.428572
sp|Q62159|RHOC_MOUSE - Rhoc Rho-related GTP-binding protein RhoC [REVIEWED] ENSMUSG00000002233;IPI00122245;Q62159;Q3TUN0 xxxxx	3.56125	0	0	13.4388	0.448917
sp|Q9ES52|SHIP1_MOUSE - Inpp5d Phosphatidylinositol 3,4,5-trisphosphate 5-phosphatase 1 [REVIEWED] ENSMUSG00000026288;IPI00857938;Q9ES52;Q3UPF9;Q4U212;Q61034;Q61173;Q61181;Q9JKR7;Q9JLF9;Q9JLG0;Q9QVN8;Q9WUC2 xxxxx	3.0044	5.43654	10.2216	11.3375	0.960819
sp|P67778|PHB_MOUSE - Phb Prohibitin [REVIEWED] ENSMUSG00000038845;IPI00133440;P67778;P24142;Q3UB75;Q5SQG4 xxxxx	4.25077	0	0	13.7492	0.42291
sp|Q9R112|SQRD_MOUSE - Sqrdl Sulfide:quinone oxidoreductase, mitochondrial [REVIEWED] ENSMUSG00000005803;IPI00313998;Q9R112;Q8BW20;Q91XA1;Q9D891 xxxxx	3.30331	3.73588	4.49541	12.4654	0.660189
sp|Q9QVP9|FAK2_MOUSE - Ptk2b Protein-tyrosine kinase 2-beta [REVIEWED] ENSMUSG00000059456;IPI00133132;Q9QVP9;B2RQ16;G3X8V1 xxxxx	1.77596	4.82047	0	13.4036	0.330511
sp|Q80SU7|GVIN1_MOUSE - Gvin1 Interferon-induced very large GTPase 1 [REVIEWED] ENSMUSG00000078606;IPI00850922;Q80SU7;Q3U3F2;Q8BL18;Q8CBA9 xxxxx	0	7.87008	0	13.1299	0.236095
sp|Q9D379|HYEP_MOUSE - Ephx1 Epoxide hydrolase 1 [REVIEWED] ENSMUSG00000038776;IPI00316509;Q9D379;P97869 xxxxx	5.07013	2.58034	0	14.3495	0.309303
sp|P47911|RL6_MOUSE - Rpl6 60S ribosomal protein L6 [REVIEWED] ENSMUSG00000029614;IPI00313222;P47911;Q6P5I2;Q925C3 xxxxx	4.321	7.16737	17.6411	10.8705	0.853645
sp|P45376|ALDR_MOUSE - Akr1b1 Aldose reductase [REVIEWED] ENSMUSG00000071414;ENSMUSG00000001642;IPI00223757;P45376;O70130;Q99KC9 xxxxx	1.80828	6.54424	0	13.6475	0.250891
sp|P46978|STT3A_MOUSE - Stt3a Dolichyl-diphosphooligosaccharide--protein glycosyltransferase subunit STT3A [REVIEWED] ENSMUSG00000032116;IPI00109108;P46978 xxxxx	6.50527	1.76572	0	14.729	0.283062
sp|P50580|PA2G4_MOUSE - Pa2g4 Proliferation-associated protein 2G4 [REVIEWED] ENSMUSG00000025364;IPI00119305;P50580 xxxxx	3.7754	5.97771	0	14.2469	0.215252
sp|Q8BX70|VP13C_MOUSE - Vps13c Vacuolar protein sorting-associated protein 13C [REVIEWED] ENSMUSG00000035284;IPI00761666;Q8BX70;Q3V3W5;Q6ZPE1;Q8BLB1;Q8BQI7 xxxxx	2.12999	10.1174	8.69597	12.0566	0.570157
sp|Q8JZQ9|EIF3B_MOUSE - Eif3b Eukaryotic translation initiation factor 3 subunit B [REVIEWED] ENSMUSG00000056076;IPI01008667;Q8JZQ9;Q922K2 xxxxx	5.88168	5.32152	0	14.7968	0.169134
sp|Q64324|STXB2_MOUSE - Stxbp2 Syntaxin-binding protein 2 [REVIEWED] ENSMUSG00000004626;IPI00133317;Q64324 xxxxx	3.81829	7.77295	0	14.4088	0.132168
sp|Q9WUA3|K6PP_MOUSE - Pfkp 6-phosphofructokinase type C [REVIEWED] ENSMUSG00000021196;IPI00661241;Q9WUA3;Q3TNA9;Q3U4P1;Q3U7G4;Q4KUG1;Q543K8;Q8C5I6;Q9JI86 xxxxx	2.78104	9.81309	6.8124	12.5935	0.467676
Reverse_sp|A2ASS6|TITIN_MOUSE - Ttn Titin [REVIEWED] ENSMUSG00000051747;IPI00756257;A2ASS6;A2ASS5;A2ASS7 xxxxx	3.18708	10.3808	0	14.4322	0.0378725
sp|P01899|HA11_MOUSE - H2-D1 H-2 class I histocompatibility antigen, D-B alpha chain [REVIEWED] ENSMUSG00000073411;IPI01026878;P01899 xxxxx	3.50331	9.50898	4.76759	13.2201	0.321308
sp|P63101|1433Z_MOUSE - Ywhaz 14-3-3 protein zeta/delta [REVIEWED] ENSMUSG00000022285;IPI00116498;P63101;P35215;P70197;P97286;Q3TSF1;Q5EBQ1 xxxxx	3.0734	14.5987	16.7301	11.5978	0.512746
sp|P28798|GRN_MOUSE - Grn Granulins [REVIEWED] ENSMUSG00000034708;IPI00124640;P28798 xxxxx	3.87292	10.5122	0	14.6149	0.0101206
sp|Q8BP47|SYNC_MOUSE - Nars Asparagine--tRNA ligase, cytoplasmic [REVIEWED] ENSMUSG00000024587;IPI00223415;Q8BP47;Q3T9A7;Q7TPX0;Q9CRY5 xxxxx	12.096	5.79387	0	16.1102	-0.0725533
sp|Q9CQI6|COTL1_MOUSE - Cotl1 Coactosin-like protein [REVIEWED] ENSMUSG00000031827;IPI00132575;Q9CQI6 xxxxx	10.8579	6.20451	13.9986	12.939	0.825595
sp|O09159|MA2B1_MOUSE - Man2b1 Lysosomal alpha-mannosidase [REVIEWED] ENSMUSG00000005142;IPI00381303;O09159;O55037;Q3UGH3;Q64443;Q9DBQ1 xxxxx	15.0172	6.20274	7.99692	14.7832	0.0986908
sp|Q6R5N8|TLR13_MOUSE - Tlr13 Toll-like receptor 13 [REVIEWED] ENSMUSG00000033777;IPI00342691;Q6R5N8;Q148Y7;Q3TDS2 xxxxx	5.80026	12.5948	9.47215	13.1327	0.359858
sp|P23780|BGAL_MOUSE - Glb1 Beta-galactosidase [REVIEWED] ENSMUSG00000045594;IPI00135915;P23780 xxxxx	8.90592	9.49662	5.19425	14.4032	0.0911812
sp|Q9DCN2|NB5R3_MOUSE - Cyb5r3 NADH-cytochrome b5 reductase 3 [REVIEWED] ENSMUSG00000018042;IPI00759904;Q9DCN2 xxxxx	6.63903	18.8393	9.85629	13.6653	-0.107626
sp|Q8K183|PDXK_MOUSE - Pdxk Pyridoxal kinase [REVIEWED] ENSMUSG00000032788;IPI00283511;Q8K183;Q3TM83;Q8BJQ5 xxxxx	9.6927	11.4005	5.27625	14.6306	-0.0878763
sp|Q6P5E4|UGGG1_MOUSE - Uggt1 UDP-glucose:glycoprotein glucosyltransferase 1 [REVIEWED] ENSMUSG00000037470;IPI00762897;Q6P5E4;E9QQ49;Q6NV70 xxxxx	9.69495	10.6904	9.89526	13.7194	0.500329
sp|Q9JII6|AK1A1_MOUSE - Akr1a1 Alcohol dehydrogenase [NADP(+)] [REVIEWED] ENSMUSG00000028692;IPI00466128;Q9JII6;Q9CQI5;Q9CQT8;Q9CT53;Q9D012;Q9D016;Q9D0I7;Q9D0P3 xxxxx	6.10718	9.6697	18.7001	11.5231	0.786825
sp|Q922R8|PDIA6_MOUSE - Pdia6 Protein disulfide-isomerase A6 [REVIEWED] ENSMUSG00000020571;IPI00222496;Q922R8;Q8BK54 xxxxx	13.5133	14.6716	5.51699	15.2982	-0.467657
sp|Q3TW96|UAP1L_MOUSE - Uap1l1 UDP-N-acetylhexosamine pyrophosphorylase-like protein 1 [REVIEWED] ENSMUSG00000026956;IPI00889248;Q3TW96;A1L3D3;Q6KAP8;Q6NVB6;Q80XP4 xxxxx	9.90686	20.9145	24.7171	12.4615	0.26326
sp|P16045|LEG1_MOUSE - Lgals1 Galectin-1 [REVIEWED] ENSMUSG00000068220;IPI00229517;P16045;P05163;P11946;P17601;Q4FZH4;Q99M27;Q9D0X0 xxxxx	17.7561	16.3519	15.5339	14.3581	-0.852047
