# Supplementary material for: Disruption of glycolytic flux is a signal for inflammasome signaling and pyroptotic cell death
Source: eLife. 2016 Mar 24;5:e13663. doi: 10.7554/eLife.13663 (PMC4846378; doi:10.7554/eLife.13663)
Supplement: Supplementary file 3. — A protein was selected as a 'hit' if, in Supplementary file 2, it had over 30 spectral counts in Condition 1, showed 80% competition for az-GB binding by GB111 (Condition 2), and showed <50% competition for az-GB binding by GB-IA (Condition 3). The proteins meeting these criteria and number of spectral counts in each condition are shown. DOI: http://dx.doi.org/10.7554/eLife.13663.037 [file elife-13663-supp3.xlsx]

## Sheet: Sheet1
Supplementary File 3: Normalized and Triaged MudPIT Data
	0	0	1	1
	Condition 4; DMSO	Condition 2; GB111-NH2/az-GB	Condition 3; GB-IA/az-GB	Condition 1; DMSO/az-GB	Pearson Correlation
sp|P16858|G3P_MOUSE - Gapdh Glyceraldehyde-3-phosphate dehydrogenase [REVIEWED] ENSMUSG00000096438;ENSMUSG00000078965;ENSMUSG00000057666;IPI00273646;P16858;A6H6A8;Q0QEU0;Q3THM2;Q3TUI2;Q3UMT2;Q4V783;Q569X2;Q569X5;Q5U410 xxxxx	94.1574	114.909	191.169	266.765	0.913462
sp|P47738|ALDH2_MOUSE - Aldh2 Aldehyde dehydrogenase, mitochondrial [REVIEWED] ENSMUSG00000029455;IPI00111218;P47738 xxxxx	53.1267	53.88	134.192	105.801	0.95729
sp|Q8VDN2|AT1A1_MOUSE - Atp1a1 Sodium/potassium-transporting ATPase subunit alpha-1 [REVIEWED] ENSMUSG00000033161;IPI00311682;Q8VDN2;Q91Z09 xxxxx	34.067	29.0108	70.648	101.274	0.927414
sp|P17182|ENOA_MOUSE - Eno1 Alpha-enolase [REVIEWED] ENSMUSG00000059040;ENSMUSG00000063524;IPI00462072;P17182;Q99KT7;Q9DCY7 xxxxx	29.4062	19.4986	80.6891	98.4061	0.976542
sp|P26041|MOES_MOUSE - Msn Moesin [REVIEWED] ENSMUSG00000031207;IPI00110588;P26041;B1AX70;Q3UL28;Q8BSN4 xxxxx	54.4336	46.0684	87.6174	92.8805	0.985077
sp|Q9DCD0|6PGD_MOUSE - Pgd 6-phosphogluconate dehydrogenase, decarboxylating [REVIEWED] ENSMUSG00000028961;IPI00466919;Q9DCD0;Q3UD80 xxxxx	21.3611	25.2649	78.5293	79.8446	0.998644
sp|P09411|PGK1_MOUSE - Pgk1 Phosphoglycerate kinase 1 [REVIEWED] ENSMUSG00000069008;ENSMUSG00000062070;ENSMUSG00000066632;IPI00555069;P09411;Q3TPE6;Q3UKV8;Q5XJE7 xxxxx	39.6332	43.7088	90.5718	71.0861	0.941042
sp|P40124|CAP1_MOUSE - Cap1 Adenylyl cyclase-associated protein 1 [REVIEWED] ENSMUSG00000028656;IPI00137331;P40124;Q8BPT7 xxxxx	17.6796	21.8373	63.7112	54.7719	0.984768
sp|Q99KI0|ACON_MOUSE - Aco2 Aconitate hydratase, mitochondrial [REVIEWED] ENSMUSG00000022477;IPI00116074;Q99KI0;Q3UDK9;Q3ULG9;Q3UNH7;Q505P4 xxxxx	26.4497	23.1374	55.6579	54.7549	0.996829
sp|Q8K2B3|DHSA_MOUSE - Sdha Succinate dehydrogenase [ubiquinone] flavoprotein subunit, mitochondrial [REVIEWED] ENSMUSG00000021577;IPI00230351;Q8K2B3;Q0QF19;Q3UH25;Q3UKP7;Q3V4B1;Q921P5;Q9Z1Z4 xxxxx	19.1727	19.7346	37.0737	50.019	0.934692
sp|P37040|NCPR_MOUSE - Por NADPH--cytochrome P450 reductase [REVIEWED] ENSMUSG00000005514;IPI00621548;P37040 xxxxx	23.5913	18.4157	50.0353	47.9578	0.990222
sp|P63038|CH60_MOUSE - Hspd1 60 kDa heat shock protein, mitochondrial [REVIEWED] ENSMUSG00000025980;IPI00845678;P63038;P19226;P19227;P97602;Q3KQP2;Q3UIP0;Q8C2C7;Q8VEF4 xxxxx	3.11542	7.62745	41.7929	43.4643	0.995856
sp|Q60710|SAMH1_MOUSE - Samhd1 SAM domain and HD domain-containing protein 1 [REVIEWED] ENSMUSG00000027639;IPI00120095;Q60710;Q3U5X2;Q543A4;Q91VK8 xxxxx	19.747	21.4873	49.0093	40.7564	0.971099
sp|Q62465|VAT1_MOUSE - Vat1 Synaptic vesicle membrane protein VAT-1 homolog [REVIEWED] ENSMUSG00000034993;IPI00126072;Q62465;Q8R3G0;Q8R3T8 xxxxx	8.33963	18.683	33.5027	38.4747	0.940578
sp|Q6PIC6|AT1A3_MOUSE - Atp1a3 Sodium/potassium-transporting ATPase subunit alpha-3 [REVIEWED] ENSMUSG00000040907;IPI00122048;Q6PIC6 xxxxx	14.121	13.6582	25.5127	34.708	0.928041
sp|Q99LR1|ABD12_MOUSE - Abhd12 Monoacylglycerol lipase ABHD12 [REVIEWED] ENSMUSG00000032046;IPI00165731;Q99LR1;A2ANB4;Q99M06 xxxxx	16.7671	17.0677	29.9025	34.2626	0.979862
sp|P06151|LDHA_MOUSE - Ldha L-lactate dehydrogenase A chain [REVIEWED] ENSMUSG00000063229;IPI00319994;P06151 xxxxx	9.44355	13.8723	39.9246	32.7595	0.9721
tr|Q9JHF5|Q9JHF5_MOUSE - Tcirg1 T-cell, immune regulator 1, ATPase, H+ transporting, lysosomal V0 protein A3, isoform CRA_b [NOT_REVIEWED] ENSMUSG00000001750;IPI00914724;Q9JHF5 xxxxx	10.2183	10.5893	26.9011	32.2913	0.980757
sp|P56480|ATPB_MOUSE - Atp5b ATP synthase subunit beta, mitochondrial [REVIEWED] ENSMUSG00000025393;IPI00468481;P56480;Q0QEP4;Q3TFD7;Q3TIP9;Q3TK44;Q3TWD5;Q3TX28;Q3U6U4;Q3U774;Q3UB69;Q3UF69;Q8CI65;Q8VEJ5;Q9CTI7;Q9CWX7 xxxxx	5.86252	7.85129	21.9985	31.2876	0.946919
**Elim <30 spectral counts in az-GB, required 80% competition for az-GB binding by GB111, required less than 50% competition for az-GB binding by GB-IA, ranked by number of spectral counts
